# Supplementary material for: What causes the weakest host to act as the strongest one? A theoretical study on the host–guest chemistry of five azacryptands and fluoride anions
Source: Royal Society of Chemistry journal article supplement (doi:10.1039/c5dt01965f), 2015-01-01
Supplement: c5dt01965f1.pdf [file c5dt01965f1.pdf]

# Supplementary Information

for

**What causes the weakest host to act as the strongest one?**

**A theoretical study on host-guest chemistry of five  
azacryptands and fluoride anion**

Sadegh Salehzadeh\* and Yasin Gholiee

*Faculty of Chemistry, Bu-Ali Sina University, Hamedan, Iran*

**Table S1.** Computed and experimental distances (Å) for five complexes studied here<sup>a</sup>.

| Complex                            | F...H1       | F...H2       | F...H3       | F...H4       | F...H5       | F...H6       | rms          |
|------------------------------------|--------------|--------------|--------------|--------------|--------------|--------------|--------------|
| [F⊂H <sub>6</sub> 1] <sup>5+</sup> | 1.688        | 2.555        | 1.537        | 1.724        | –            | –            | –            |
|                                    | <i>1.678</i> | <i>2.462</i> | <i>1.545</i> | <i>1.706</i> | –            | –            | –            |
|                                    | –            | –            | –            | –            | –            | –            | –            |
| [F⊂H <sub>6</sub> 2] <sup>5+</sup> | 1.653        | 1.683        | 1.670        | –            | –            | –            | –            |
|                                    | <i>1.652</i> | <i>1.641</i> | <i>1.675</i> | –            | –            | –            | –            |
|                                    | –            | –            | –            | –            | –            | –            | –            |
| [F⊂H <sub>6</sub> 3] <sup>5+</sup> | 2.678        | 2.777        | 2.980        | 1.614        | 1.705        | 1.714        | 0.209        |
|                                    | <i>2.670</i> | <i>2.760</i> | <i>2.952</i> | <i>1.611</i> | <i>1.682</i> | <i>1.696</i> | <i>0.199</i> |
|                                    | <b>2.510</b> | <b>2.392</b> | <b>2.830</b> | <b>1.861</b> | <b>1.661</b> | <b>1.693</b> | –            |
| [F⊂H <sub>6</sub> 4] <sup>5+</sup> | 2.028        | 1.977        | 1.976        | 1.976        | 2.016        | 1.992        | 0.113        |
|                                    | <i>2.008</i> | <i>1.956</i> | <i>1.994</i> | <i>1.958</i> | <i>1.956</i> | <i>1.970</i> | <i>0.132</i> |
|                                    | <b>2.071</b> | <b>1.949</b> | <b>1.904</b> | <b>1.998</b> | <b>2.223</b> | <b>1.830</b> | –            |
|                                    | F...H1       | F...H2       | F...C1       | F...C2       | F...C3       |              |              |
| [F⊂H <sub>2</sub> 5] <sup>5+</sup> | 1.537        | 1.537        | 2.611        | 2.612        | 2.608        | –            | 0.108        |
|                                    | <i>1.539</i> | <i>1.541</i> | <i>2.574</i> | <i>2.566</i> | <i>2.569</i> | –            | <i>0.108</i> |
|                                    | <b>1.676</b> | <b>1.735</b> | <b>2.609</b> | <b>2.587</b> | <b>2.596</b> | –            | –            |

<sup>a</sup> The data obtained at the PBE/TZVP level are given as plain text, those for the B3P86/TZVP level are in italic and experimental data are in bold.

**Table S2.** Calculated  $\Delta G_{\text{gas}}^0$ ,  $\Delta G_{\text{solv}}^0$  and  $\Delta G_{\text{aq}}^0$  values for formation of studied complexes in water<sup>a</sup>.

| Complex                            | $\Delta G_{\text{gas}}^0$ | $\Delta G_{\text{solv}}^0$ | $\Delta G_{\text{aq}}^0$ |
|------------------------------------|---------------------------|----------------------------|--------------------------|
| [F⊂H <sub>6</sub> 1] <sup>5+</sup> | -421.56                   | 394.62                     | -26.94                   |
|                                    | <i>-418.92</i>            | 382.10                     | <i>-36.82</i>            |
| [F⊂H <sub>6</sub> 2] <sup>5+</sup> | -462.67                   | 422.12                     | -40.55                   |
|                                    | <i>-460.56</i>            | <i>418.81</i>              | <i>-41.75</i>            |
| [F⊂H <sub>6</sub> 3] <sup>5+</sup> | -464.57                   | 419.28                     | -45.29                   |
|                                    | <i>-463.14</i>            | <i>414.51</i>              | <i>-48.63</i>            |
| [F⊂H <sub>6</sub> 4] <sup>5+</sup> | -490.31                   | 431.53                     | -58.78                   |
|                                    | <i>-489.53</i>            | <i>430.75</i>              | <i>-58.78</i>            |
| [F⊂H <sub>2</sub> 5] <sup>4+</sup> | -446.28                   | 364.92                     | -81.36                   |
|                                    | <i>-446.23</i>            | <i>365.43</i>              | <i>-80.80</i>            |

<sup>a</sup> The data obtained at the PBE/TZVP level are given as plain text, those for the B3P86/TZVP level are in italic. Solvation energies have been calculated using DPCM model.

Cartesian coordinate representation of the optimized molecular structures of  $H_61^{6+}$ ,  $H_62^{6+}$ ,  $H_63^{6+}$ ,  $H_64^{6+}$ ,  $H_25^{5+}$ ,  $H_6222^{6+}$ ,  $[F\subset H_61]^{5+}$ ,  $[F\subset H_62]^{5+}$ ,  $[F\subset H_63]^{5+}$ ,  $[F\subset H_64]^{5+}$  and  $[F\subset H_25]^{4+}$  at PBE/TZVP level of theory:

| $H_61^{6+}$ |              |              |              |
|-------------|--------------|--------------|--------------|
| N           | -3.277354000 | 1.509348000  | 0.398586000  |
| C           | -3.350902000 | 1.335985000  | 1.876524000  |
| C           | -3.111808000 | -0.127852000 | 2.305394000  |
| N           | -2.761529000 | -0.250587000 | 3.775443000  |
| C           | -2.507118000 | -1.667153000 | 4.313570000  |
| C           | -1.440524000 | -2.455143000 | 3.558669000  |
| O           | -0.150003000 | -1.818216000 | 3.545749000  |
| C           | 4.225706000  | -0.212219000 | -0.619192000 |
| C           | 3.533865000  | 1.119673000  | -0.980587000 |
| N           | 4.515925000  | 2.247613000  | -1.238630000 |
| C           | 3.912591000  | 3.569005000  | -1.750956000 |
| C           | 3.194510000  | 4.418818000  | -0.718375000 |
| O           | 1.877919000  | 3.905394000  | -0.408370000 |
| C           | 1.225779000  | 4.630049000  | 0.651660000  |
| C           | 0.016270000  | 5.454729000  | 0.226637000  |
| N           | -1.182735000 | 4.656404000  | -0.322000000 |
| C           | -1.623565000 | 3.442150000  | 0.474517000  |
| C           | -3.014782000 | 2.932938000  | 0.040763000  |
| N           | 3.240906000  | -1.322088000 | -0.459382000 |
| C           | 3.776966000  | -2.426094000 | 0.394771000  |
| C           | 4.031816000  | -2.129313000 | 1.873475000  |
| N           | 2.800784000  | -1.803838000 | 2.727314000  |
| C           | 2.034128000  | -2.968660000 | 3.344472000  |
| C           | 0.910966000  | -2.488067000 | 4.264414000  |
| C           | -4.559043000 | 1.082582000  | -0.245990000 |
| C           | -4.479734000 | 0.747382000  | -1.742977000 |
| N           | -3.998575000 | -0.665015000 | -2.044360000 |
| C           | -3.670947000 | -0.951757000 | -3.507059000 |
| C           | -3.022742000 | -2.316107000 | -3.670397000 |
| O           | -1.783617000 | -2.334545000 | -2.915433000 |
| C           | -1.227958000 | -3.647402000 | -2.702328000 |
| C           | 0.023376000  | -3.940688000 | -3.520666000 |
| N           | 1.185141000  | -2.962809000 | -3.284951000 |
| C           | 1.651828000  | -2.756992000 | -1.855336000 |
| C           | 2.910068000  | -1.864272000 | -1.809217000 |
| H           | -3.088337000 | 3.004778000  | -1.056031000 |
| H           | -3.797181000 | 3.602742000  | 0.451115000  |
| H           | -0.859335000 | 2.669086000  | 0.319425000  |
| H           | -1.609312000 | 3.757323000  | 1.526300000  |
| H           | -0.967272000 | 4.375341000  | -1.290656000 |

|   |              |              |              |
|---|--------------|--------------|--------------|
| H | -1.966237000 | 5.329388000  | -0.396226000 |
| H | 0.260417000  | 6.185035000  | -0.558241000 |
| H | -0.358597000 | 6.009117000  | 1.100150000  |
| H | 1.912002000  | 5.350825000  | 1.127947000  |
| H | 0.948834000  | 3.906379000  | 1.435771000  |
| H | 3.797384000  | 4.512216000  | 0.204654000  |
| H | 3.125188000  | 5.430095000  | -1.157757000 |
| H | 4.768476000  | 4.146889000  | -2.131976000 |
| H | 3.270112000  | 3.310974000  | -2.603450000 |
| H | 5.209757000  | 1.944135000  | -1.944561000 |
| H | 5.070780000  | 2.448569000  | -0.389079000 |
| H | 2.863740000  | 1.462734000  | -0.183175000 |
| H | 2.945274000  | 1.036027000  | -1.903897000 |
| H | 4.995094000  | -0.465178000 | -1.376414000 |
| H | 4.764691000  | -0.084322000 | 0.330223000  |
| H | 3.080556000  | -3.273708000 | 0.316486000  |
| H | 4.747425000  | -2.801853000 | 0.011086000  |
| H | 4.726154000  | -1.291050000 | 2.020040000  |
| H | 4.507999000  | -3.009719000 | 2.328346000  |
| H | 3.120940000  | -1.210016000 | 3.509298000  |
| H | 2.147083000  | -1.232067000 | 2.170604000  |
| H | 1.660627000  | -3.593639000 | 2.523278000  |
| H | 2.760786000  | -3.550647000 | 3.931173000  |
| H | 1.303106000  | -1.795542000 | 5.029463000  |
| H | 0.536633000  | -3.372868000 | 4.804264000  |
| H | -1.747270000 | -2.632038000 | 2.514675000  |
| H | -1.400811000 | -3.444412000 | 4.044317000  |
| H | -2.244616000 | -1.530307000 | 5.372780000  |
| H | -3.465515000 | -2.205281000 | 4.266449000  |
| H | -3.519505000 | 0.155461000  | 4.352380000  |
| H | -1.921534000 | 0.313085000  | 3.979667000  |
| H | -3.992899000 | -0.765508000 | 2.150677000  |
| H | -2.264795000 | -0.542286000 | 1.744503000  |
| H | -4.308204000 | 1.709697000  | 2.290244000  |
| H | -2.555885000 | 1.951930000  | 2.324815000  |
| H | -5.334966000 | 1.865329000  | -0.139972000 |
| H | -4.958137000 | 0.214125000  | 0.300648000  |
| H | -3.812671000 | 1.422856000  | -2.293852000 |
| H | -5.478872000 | 0.835131000  | -2.193069000 |
| H | -4.721924000 | -1.335648000 | -1.736166000 |
| H | -3.144783000 | -0.872677000 | -1.502461000 |
| H | -4.606055000 | -0.901225000 | -4.082873000 |
| H | -3.006348000 | -0.144955000 | -3.843605000 |
| H | -3.691978000 | -3.122372000 | -3.320523000 |
| H | -2.847377000 | -2.474505000 | -4.748131000 |
| H | -1.022473000 | -3.748394000 | -1.624566000 |
| H | -1.950446000 | -4.440290000 | -2.959083000 |
| H | 0.395177000  | -4.946910000 | -3.276069000 |
| H | -0.166707000 | -3.904127000 | -4.603393000 |
| H | 0.911759000  | -2.054616000 | -3.691519000 |
| H | 1.975337000  | -3.303115000 | -3.860959000 |
| H | 0.821995000  | -2.287958000 | -1.311352000 |

|   |             |              |              |
|---|-------------|--------------|--------------|
| H | 1.828537000 | -3.761333000 | -1.447966000 |
| H | 3.771742000 | -2.421288000 | -2.230490000 |
| H | 2.737615000 | -1.003216000 | -2.473685000 |

H<sub>6</sub>2<sup>6+</sup>

|   |              |              |              |
|---|--------------|--------------|--------------|
| N | 2.859249000  | 0.354092000  | 0.820087000  |
| C | 3.413133000  | 1.688681000  | 1.206862000  |
| C | 2.466317000  | 2.895786000  | 1.066880000  |
| N | 2.442601000  | 3.556129000  | -0.317493000 |
| C | 1.175498000  | 4.326168000  | -0.702144000 |
| C | -0.022563000 | 3.381913000  | -0.906897000 |
| C | -1.228098000 | 4.084835000  | -1.555997000 |
| N | -2.484800000 | 3.209954000  | -1.508574000 |
| C | -2.487764000 | 1.945335000  | -2.376151000 |
| C | -3.422330000 | 0.817849000  | -1.897161000 |
| C | 1.735807000  | -0.108758000 | 1.667332000  |
| C | 1.915874000  | -0.157951000 | 3.216988000  |
| N | 0.807475000  | -0.963765000 | 3.910165000  |
| C | -0.638941000 | -0.457883000 | 3.774229000  |
| C | -1.646338000 | -1.621177000 | 3.736778000  |
| C | -3.133895000 | -1.244275000 | 3.646580000  |
| N | -3.643644000 | -0.675413000 | 2.304741000  |
| C | -3.615839000 | -1.604507000 | 1.095179000  |
| C | -3.949348000 | -0.935451000 | -0.251128000 |
| C | 3.955515000  | -0.653167000 | 0.681022000  |
| C | 3.633956000  | -1.912527000 | -0.145435000 |
| N | 3.658478000  | -1.716846000 | -1.657983000 |
| C | 3.158846000  | -2.886315000 | -2.533568000 |
| C | 1.675273000  | -3.273057000 | -2.421409000 |
| C | 0.656165000  | -2.288972000 | -3.023527000 |
| N | -0.784727000 | -2.811016000 | -2.887672000 |
| C | -1.904630000 | -1.778091000 | -2.696233000 |
| C | -1.731670000 | -0.951582000 | -1.383528000 |
| N | -2.860996000 | -0.131492000 | -0.887132000 |
| H | 4.321353000  | 1.861775000  | 0.607787000  |
| H | 3.774214000  | 1.701275000  | 2.252398000  |
| H | 2.781334000  | 3.685699000  | 1.762884000  |
| H | 1.428456000  | 2.639222000  | 1.308876000  |
| H | 2.637720000  | 2.853320000  | -1.046475000 |
| H | 3.231474000  | 4.227314000  | -0.367838000 |
| H | 1.428380000  | 4.872255000  | -1.623797000 |
| H | 0.999694000  | 5.068373000  | 0.089683000  |
| H | -0.336104000 | 2.968544000  | 0.066923000  |
| H | 0.297091000  | 2.538052000  | -1.542004000 |
| H | -1.053640000 | 4.336451000  | -2.611993000 |
| H | -1.492828000 | 5.014107000  | -1.028771000 |
| H | -3.280124000 | 3.806149000  | -1.804198000 |
| H | -2.680869000 | 2.963955000  | -0.526563000 |
| H | -1.445074000 | 1.615445000  | -2.449873000 |

|   |              |              |              |
|---|--------------|--------------|--------------|
| H | -2.800763000 | 2.276317000  | -3.376180000 |
| H | -3.768596000 | 0.297748000  | -2.809967000 |
| H | -4.340350000 | 1.254769000  | -1.473110000 |
| H | 1.471777000  | -1.121661000 | 1.320577000  |
| H | 0.865483000  | 0.525143000  | 1.435062000  |
| H | 1.898842000  | 0.837165000  | 3.681429000  |
| H | 2.854812000  | -0.647783000 | 3.514103000  |
| H | 1.045319000  | -1.006475000 | 4.919223000  |
| H | 0.858231000  | -1.946695000 | 3.594265000  |
| H | -0.663842000 | 0.142399000  | 2.855702000  |
| H | -0.816674000 | 0.211574000  | 4.627883000  |
| H | -1.580193000 | -2.191325000 | 4.680563000  |
| H | -1.381246000 | -2.339068000 | 2.941921000  |
| H | -3.414380000 | -0.498546000 | 4.405880000  |
| H | -3.741527000 | -2.141396000 | 3.833864000  |
| H | -3.153343000 | 0.201018000  | 2.075888000  |
| H | -4.628597000 | -0.402997000 | 2.477859000  |
| H | -4.363906000 | -2.385141000 | 1.297264000  |
| H | -2.631019000 | -2.088294000 | 1.095011000  |
| H | -4.824940000 | -0.279077000 | -0.125540000 |
| H | -4.312739000 | -1.749762000 | -0.906158000 |
| H | 4.317131000  | -1.022766000 | 1.659256000  |
| H | 4.828843000  | -0.143797000 | 0.244111000  |
| H | 2.653667000  | -2.340674000 | 0.098604000  |
| H | 4.390191000  | -2.681023000 | 0.072004000  |
| H | 4.641766000  | -1.559173000 | -1.945270000 |
| H | 3.160193000  | -0.848465000 | -1.899596000 |
| H | 3.775879000  | -3.750675000 | -2.248519000 |
| H | 3.434434000  | -2.617254000 | -3.564597000 |
| H | 1.415389000  | -3.509695000 | -1.375416000 |
| H | 1.616928000  | -4.234352000 | -2.962391000 |
| H | 0.828085000  | -2.125645000 | -4.097050000 |
| H | 0.672754000  | -1.313733000 | -2.520198000 |
| H | -0.828863000 | -3.501892000 | -2.119879000 |
| H | -1.015244000 | -3.358474000 | -3.738449000 |
| H | -2.837164000 | -2.361319000 | -2.704438000 |
| H | -1.894751000 | -1.153247000 | -3.599444000 |
| H | -0.865856000 | -0.281207000 | -1.503240000 |
| H | -1.462066000 | -1.649093000 | -0.573073000 |

### H<sub>6</sub>3<sup>6+</sup>

|   |              |              |              |
|---|--------------|--------------|--------------|
| N | -2.361646000 | 3.709922000  | -0.591737000 |
| H | -2.787336000 | 4.655401000  | -0.636688000 |
| H | -2.080167000 | 3.499030000  | -1.561284000 |
| N | -1.981621000 | -2.003279000 | 3.492015000  |
| H | -1.923698000 | -2.909936000 | 3.000240000  |
| H | -2.247060000 | -2.250594000 | 4.464856000  |
| N | -2.498779000 | -2.163935000 | -3.165325000 |
| H | -2.466647000 | -1.317446000 | -3.756397000 |
| H | -2.860465000 | -2.907026000 | -3.793914000 |

|   |              |              |              |
|---|--------------|--------------|--------------|
| N | 2.275299000  | 3.791216000  | -0.497602000 |
| H | 3.085499000  | 4.113053000  | -1.058470000 |
| H | 2.486974000  | 4.104654000  | 0.466179000  |
| N | 2.564675000  | -1.613616000 | 2.571684000  |
| H | 1.859913000  | -1.513171000 | 1.828017000  |
| H | 2.958994000  | -2.564891000 | 2.476937000  |
| N | 2.061346000  | -1.545293000 | -2.896007000 |
| H | 1.410605000  | -0.988042000 | -2.325449000 |
| H | 2.256330000  | -0.992294000 | -3.747763000 |
| N | 3.346056000  | 0.066163000  | -0.193600000 |
| C | -3.188603000 | 1.274030000  | -0.019567000 |
| C | -3.289710000 | 0.390503000  | -1.112126000 |
| H | -3.530692000 | 0.792792000  | -2.102068000 |
| C | -3.228764000 | -1.007314000 | -0.930387000 |
| C | -3.102288000 | -1.513120000 | 0.378300000  |
| H | -3.183562000 | -2.594547000 | 0.528761000  |
| C | -3.015834000 | -0.658537000 | 1.494227000  |
| C | -3.045085000 | 0.729941000  | 1.272995000  |
| H | -3.067074000 | 1.401957000  | 2.136012000  |
| C | -3.508203000 | 2.756808000  | -0.167405000 |
| H | -4.293208000 | 2.914003000  | -0.922492000 |
| H | -3.883070000 | 3.167103000  | 0.780467000  |
| C | -3.153405000 | -1.175294000 | 2.921451000  |
| H | -3.293935000 | -0.343774000 | 3.624642000  |
| H | -4.033490000 | -1.831558000 | 3.013437000  |
| C | -3.561188000 | -1.980363000 | -2.055078000 |
| H | -3.742371000 | -2.987315000 | -1.656660000 |
| H | -4.474145000 | -1.672161000 | -2.588482000 |
| C | -1.156342000 | 3.757110000  | 0.336661000  |
| H | -0.768328000 | 2.730451000  | 0.372280000  |
| H | -1.574328000 | 3.992931000  | 1.325393000  |
| C | -0.088183000 | 4.820829000  | -0.001680000 |
| H | -0.590263000 | 5.743768000  | -0.344198000 |
| H | 0.352888000  | 5.140061000  | 0.958838000  |
| C | 1.041887000  | 4.570936000  | -1.016586000 |
| H | 0.732659000  | 4.062384000  | -1.940605000 |
| H | 1.445880000  | 5.550790000  | -1.312096000 |
| C | -0.630059000 | -1.316510000 | 3.495807000  |
| H | -0.745382000 | -0.422276000 | 4.125405000  |
| H | -0.474509000 | -0.986661000 | 2.456701000  |
| C | 0.515768000  | -2.202819000 | 4.019903000  |
| H | 0.348469000  | -2.434805000 | 5.085168000  |
| H | 0.545581000  | -3.181851000 | 3.510041000  |
| C | 1.894610000  | -1.519215000 | 3.952904000  |
| H | 1.841914000  | -0.451766000 | 4.208715000  |
| H | 2.588931000  | -1.992800000 | 4.660734000  |
| C | -1.104563000 | -2.529700000 | -2.695478000 |
| H | -1.200327000 | -3.493629000 | -2.174914000 |
| H | -0.847829000 | -1.762135000 | -1.948601000 |
| C | -0.069480000 | -2.629162000 | -3.833319000 |
| H | -0.113226000 | -1.754112000 | -4.505969000 |
| H | -0.302107000 | -3.496987000 | -4.472751000 |

|   |             |              |              |
|---|-------------|--------------|--------------|
| C | 1.373408000 | -2.846401000 | -3.336474000 |
| H | 1.424873000 | -3.540113000 | -2.485593000 |
| H | 1.994407000 | -3.263556000 | -4.141548000 |
| C | 2.199717000 | 2.273774000  | -0.569677000 |
| H | 2.017704000 | 2.046388000  | -1.629683000 |
| H | 1.320530000 | 1.967482000  | 0.011838000  |
| C | 3.459531000 | 1.552325000  | -0.046136000 |
| H | 4.366911000 | 1.936156000  | -0.551444000 |
| H | 3.584497000 | 1.790385000  | 1.020431000  |
| C | 3.677312000 | -0.599848000 | 2.297802000  |
| H | 3.285685000 | 0.376594000  | 2.612931000  |
| H | 4.505134000 | -0.854146000 | 2.976106000  |
| C | 4.191757000 | -0.609048000 | 0.852426000  |
| H | 4.363011000 | -1.650026000 | 0.534877000  |
| H | 5.201330000 | -0.155232000 | 0.887646000  |
| C | 3.370617000 | -1.680584000 | -2.111913000 |
| H | 4.108705000 | -2.091131000 | -2.816131000 |
| H | 3.195376000 | -2.437805000 | -1.336286000 |
| C | 3.872526000 | -0.340625000 | -1.543905000 |
| H | 4.977106000 | -0.400484000 | -1.522988000 |
| H | 3.653439000 | 0.462355000  | -2.266668000 |

### H<sub>6</sub>4<sup>6+</sup>

|   |              |              |              |
|---|--------------|--------------|--------------|
| C | 4.012422000  | -0.490144000 | -0.253606000 |
| C | 3.364042000  | -0.450586000 | -1.645215000 |
| C | 3.517550000  | -1.344002000 | 2.168876000  |
| N | 3.381554000  | -1.561161000 | 0.658419000  |
| C | 2.597556000  | -2.205940000 | 3.045473000  |
| N | 2.019545000  | 0.215538000  | -1.707030000 |
| C | 2.157765000  | 1.705269000  | -1.809613000 |
| C | 1.176300000  | -0.331965000 | -2.813778000 |
| N | 1.235124000  | -1.585645000 | 3.419430000  |
| C | 0.271084000  | -1.486245000 | -2.314953000 |
| C | 1.046046000  | 2.390985000  | -0.981929000 |
| N | 0.989778000  | 3.913547000  | -1.040338000 |
| N | -0.790332000 | -1.924799000 | -3.320265000 |
| C | 0.251879000  | -1.328976000 | 2.282079000  |
| C | -1.856350000 | -2.949557000 | -2.846329000 |
| C | 0.142415000  | 4.635761000  | 0.034464000  |
| C | -2.413954000 | -2.835501000 | -1.421781000 |
| C | -1.018120000 | -0.552630000 | 2.708710000  |
| N | -1.950306000 | -0.301519000 | 1.562392000  |
| C | -1.391457000 | 4.475656000  | -0.009807000 |
| C | -1.716177000 | 2.059842000  | 0.916985000  |
| N | -3.418512000 | -1.726969000 | -1.140845000 |
| C | -2.922909000 | -1.440636000 | 1.477258000  |
| N | -2.058237000 | 3.539394000  | 1.025180000  |
| C | -2.590441000 | 1.046259000  | 1.695671000  |
| C | -3.924864000 | -1.558086000 | 0.321047000  |



|   |              |              |              |
|---|--------------|--------------|--------------|
| H | 5.082292000  | -0.731484000 | -0.339089000 |
| H | 3.928286000  | 0.466479000  | 0.279080000  |
| H | 4.091895000  | 0.041558000  | -2.316741000 |
| H | 3.271097000  | -1.475903000 | -2.039283000 |
| H | 4.560249000  | -1.590832000 | 2.423843000  |
| H | 3.397749000  | -0.267595000 | 2.358959000  |
| H | 3.809473000  | -2.474274000 | 0.421304000  |
| H | 2.387176000  | -1.623597000 | 0.398674000  |
| H | 3.105936000  | -2.371716000 | 4.009885000  |
| H | 2.394792000  | -3.203483000 | 2.626747000  |
| H | 3.140238000  | 1.996210000  | -1.408679000 |
| H | 2.146211000  | 2.040469000  | -2.862597000 |
| H | 1.792854000  | -0.657200000 | -3.671199000 |
| H | 0.534822000  | 0.479997000  | -3.193021000 |
| H | 1.406806000  | -0.717067000 | 3.957271000  |
| H | 0.804367000  | -2.232007000 | 4.109639000  |
| H | 0.846963000  | -2.392738000 | -2.078534000 |
| H | -0.259534000 | -1.154525000 | -1.411291000 |
| H | 1.179550000  | 2.138073000  | 0.077502000  |
| H | 0.058758000  | 2.042131000  | -1.308472000 |
| H | 1.946745000  | 4.303622000  | -0.937314000 |
| H | 0.689608000  | 4.232942000  | -1.980284000 |
| H | -0.328280000 | -2.369291000 | -4.138241000 |
| H | -1.259100000 | -1.097864000 | -3.726736000 |
| H | 0.787816000  | -0.742507000 | 1.521262000  |
| H | 0.008963000  | -2.320525000 | 1.874013000  |
| H | -1.371214000 | -3.936377000 | -2.907124000 |
| H | -2.641168000 | -2.942991000 | -3.620186000 |
| H | 0.583757000  | 4.377343000  | 1.008357000  |
| H | 0.361720000  | 5.703500000  | -0.129403000 |
| H | -1.623797000 | -2.752509000 | -0.667591000 |
| H | -2.942966000 | -3.784328000 | -1.233482000 |
| H | -0.708215000 | 0.418752000  | 3.124016000  |
| H | -1.534696000 | -1.083988000 | 3.530519000  |
| H | -1.773081000 | 4.175790000  | -0.996978000 |
| H | -1.829578000 | 5.464623000  | 0.202389000  |
| H | -0.672832000 | 1.975199000  | 1.244571000  |
| H | -1.767301000 | 1.825649000  | -0.153778000 |
| H | -3.062193000 | -0.816475000 | -1.459284000 |
| H | -4.273165000 | -1.900931000 | -1.704378000 |
| H | -2.336237000 | -2.369503000 | 1.540816000  |
| H | -3.586243000 | -1.462472000 | 2.366886000  |
| H | -1.860819000 | 3.893083000  | 1.979876000  |
| H | -3.080096000 | 3.682977000  | 0.909732000  |
| H | -2.722783000 | 1.342198000  | 2.751918000  |
| H | -3.599872000 | 1.017160000  | 1.261243000  |
| H | -4.538042000 | -2.450277000 | 0.524030000  |
| H | -4.623943000 | -0.711002000 | 0.261242000  |

$\text{H}_2\mathbf{5}^{5+}$

|   |              |              |              |
|---|--------------|--------------|--------------|
| N | 2.819342000  | 0.002881000  | -0.002680000 |
| N | 1.122259000  | -1.414315000 | 2.411706000  |
| N | -1.115101000 | -1.414824000 | 2.413005000  |
| N | -2.819610000 | 0.000659000  | 0.002345000  |
| N | 1.116876000  | -1.385110000 | -2.429707000 |
| N | -1.121000000 | -1.385296000 | -2.428168000 |
| N | 1.117278000  | 2.797869000  | 0.016005000  |
| N | -1.119921000 | 2.797018000  | 0.018375000  |
| C | 3.276748000  | -0.521434000 | 1.372898000  |
| H | 3.253795000  | 0.328777000  | 2.067477000  |
| H | 4.330647000  | -0.817143000 | 1.256437000  |
| C | 2.485317000  | -1.713973000 | 1.937047000  |
| H | 2.434003000  | -2.556371000 | 1.230990000  |
| H | 3.066979000  | -2.090145000 | 2.795728000  |
| C | 0.003315000  | -1.708600000 | 1.766683000  |
| H | 0.002788000  | -2.190257000 | 0.786429000  |
| C | -0.773806000 | -0.978895000 | 3.810397000  |
| H | -1.195544000 | -1.703292000 | 4.523473000  |
| H | -1.205699000 | 0.006936000  | 4.030306000  |
| C | 0.782463000  | -0.979159000 | 3.809669000  |
| H | 1.214915000  | 0.006342000  | 4.029924000  |
| H | 1.204558000  | -1.704506000 | 4.521605000  |
| C | -2.478397000 | -1.717015000 | 1.940518000  |
| H | -3.057633000 | -2.094907000 | 2.800066000  |
| H | -2.426594000 | -2.558913000 | 1.233917000  |
| C | -3.273073000 | -0.525441000 | 1.378649000  |
| H | -4.326877000 | -0.822344000 | 1.264492000  |
| H | -3.249564000 | 0.324467000  | 2.073573000  |
| C | 3.275518000  | -0.926718000 | -1.144568000 |
| H | 3.256774000  | -1.952431000 | -0.752706000 |
| H | 4.328074000  | -0.675325000 | -1.346164000 |
| C | 2.479727000  | -0.823681000 | -2.457324000 |
| H | 2.426866000  | 0.207446000  | -2.837741000 |
| H | 3.059685000  | -1.381391000 | -3.212113000 |
| C | -0.002104000 | -0.679109000 | -2.361333000 |
| H | -0.002141000 | 0.410659000  | -2.288785000 |
| C | -0.780326000 | -2.813628000 | -2.749488000 |
| H | -1.203085000 | -3.068699000 | -3.733001000 |
| H | -1.211611000 | -3.496772000 | -2.005128000 |
| C | 0.776002000  | -2.813519000 | -2.750581000 |
| H | 1.208376000  | -3.496586000 | -2.006793000 |
| H | 1.197468000  | -3.068472000 | -3.734674000 |
| C | -2.484049000 | -0.824317000 | -2.453345000 |
| H | -3.065007000 | -1.382164000 | -3.207251000 |
| H | -2.432493000 | 0.206986000  | -2.833498000 |
| C | -3.277362000 | -0.928480000 | -1.139255000 |
| H | -4.330466000 | -0.677619000 | -1.338656000 |
| H | -3.257185000 | -1.954409000 | -0.748096000 |
| C | 3.275102000  | 1.456621000  | -0.236816000 |

|   |              |             |              |
|---|--------------|-------------|--------------|
| H | 3.252556000  | 1.631449000 | -1.320716000 |
| H | 4.328759000  | 1.505164000 | 0.078047000  |
| C | 2.481294000  | 2.540460000 | 0.512846000  |
| H | 2.430716000  | 2.352370000 | 1.595865000  |
| H | 3.060723000  | 3.473393000 | 0.407687000  |
| C | -0.000560000 | 2.386861000 | 0.595945000  |
| H | 0.000634000  | 1.780163000 | 1.504180000  |
| C | -0.780887000 | 3.788193000 | -1.059537000 |
| H | -1.202524000 | 4.768046000 | -0.788880000 |
| H | -1.213898000 | 3.484940000 | -2.022527000 |
| C | 0.775296000  | 3.788788000 | -1.061188000 |
| H | 1.206532000  | 3.486023000 | -2.025124000 |
| H | 1.196724000  | 4.768905000 | -0.791167000 |
| C | -2.482730000 | 2.538748000 | 0.518056000  |
| H | -3.062995000 | 3.471225000 | 0.413490000  |
| H | -2.429929000 | 2.351324000 | 1.601073000  |
| C | -3.277527000 | 1.454126000 | -0.229536000 |
| H | -4.330251000 | 1.501516000 | 0.088667000  |
| H | -3.258426000 | 1.629801000 | -1.313355000 |
| H | 1.787812000  | 0.002838000 | -0.002118000 |
| H | -1.788076000 | 0.001847000 | 0.000489000  |

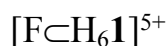

|   |              |              |              |
|---|--------------|--------------|--------------|
| N | 4.193428000  | -0.212118000 | 0.508149000  |
| C | 3.185144000  | -0.312909000 | 1.601019000  |
| C | 1.769589000  | -0.319061000 | 1.004970000  |
| N | 0.620824000  | -0.183065000 | 1.973544000  |
| C | 0.375850000  | -1.333399000 | 2.923316000  |
| C | -0.866610000 | -1.123036000 | 3.771564000  |
| O | -2.012928000 | -1.123816000 | 2.918496000  |
| C | -3.254129000 | -1.065023000 | 3.642035000  |
| C | -4.375145000 | -1.285899000 | 2.647678000  |
| N | -4.363668000 | -0.227665000 | 1.557315000  |
| C | -5.330364000 | -0.488895000 | 0.421785000  |
| C | -5.228858000 | 0.551921000  | -0.688880000 |
| C | 5.140469000  | 0.921997000  | 0.723513000  |
| C | 4.562281000  | 2.332642000  | 0.621700000  |
| N | 4.152816000  | 2.716890000  | -0.785451000 |
| C | 3.582290000  | 4.120046000  | -0.993695000 |
| C | 2.377111000  | 4.437599000  | -0.133584000 |
| O | 1.327333000  | 3.470786000  | -0.359761000 |
| C | 0.201090000  | 3.667058000  | 0.514281000  |
| C | -1.114991000 | 3.953076000  | -0.196502000 |
| N | -1.696759000 | 2.780041000  | -0.962955000 |
| C | -3.173099000 | 2.971610000  | -1.261314000 |
| C | -3.777801000 | 1.865699000  | -2.120295000 |
| C | 5.013236000  | -1.452392000 | 0.386917000  |
| C | 4.281862000  | -2.723519000 | -0.039990000 |
| N | 3.843829000  | -2.710136000 | -1.491743000 |

|   |              |              |              |
|---|--------------|--------------|--------------|
| C | 3.080964000  | -3.934872000 | -1.998409000 |
| C | 1.766020000  | -4.201020000 | -1.296893000 |
| O | 0.846475000  | -3.106747000 | -1.497439000 |
| C | -0.450159000 | -3.377141000 | -0.930132000 |
| C | -1.565062000 | -2.851863000 | -1.821032000 |
| N | -1.488094000 | -1.363590000 | -2.064300000 |
| C | -2.544194000 | -0.834324000 | -3.025673000 |
| C | -3.908497000 | -0.556892000 | -2.403758000 |
| N | -3.942252000 | 0.560608000  | -1.432148000 |
| F | -1.125229000 | 0.314931000  | 0.109402000  |
| H | -4.743400000 | 2.248350000  | -2.504133000 |
| H | -3.155838000 | 1.733379000  | -3.018611000 |
| H | -3.277079000 | 3.936455000  | -1.778296000 |
| H | -3.673336000 | 3.066165000  | -0.287772000 |
| H | -1.856376000 | 4.231377000  | 0.566636000  |
| H | -1.027419000 | 4.795307000  | -0.896980000 |
| H | 0.376800000  | 4.519487000  | 1.190385000  |
| H | 0.089036000  | 2.768321000  | 1.146607000  |
| H | 2.052620000  | 5.454550000  | -0.416841000 |
| H | 2.642390000  | 4.468547000  | 0.937600000  |
| H | 4.386681000  | 4.836658000  | -0.773393000 |
| H | 3.346475000  | 4.186668000  | -2.065184000 |
| H | 3.681696000  | 2.477806000  | 1.259275000  |
| H | 5.328687000  | 3.053268000  | 0.941185000  |
| H | 5.962119000  | 0.816319000  | -0.002446000 |
| H | 5.619415000  | 0.860823000  | 1.720626000  |
| H | -5.390318000 | 1.552161000  | -0.256387000 |
| H | -6.091484000 | 0.386123000  | -1.364486000 |
| H | -6.344245000 | -0.479671000 | 0.846166000  |
| H | -5.132281000 | -1.511353000 | 0.073970000  |
| H | -5.353933000 | -1.248285000 | 3.145472000  |
| H | -4.272033000 | -2.257574000 | 2.147100000  |
| H | -3.354465000 | -0.097467000 | 4.169447000  |
| H | -3.314749000 | -1.863846000 | 4.401995000  |
| H | -0.914817000 | -1.949736000 | 4.503382000  |
| H | -0.802915000 | -0.181204000 | 4.351893000  |
| H | 0.272739000  | -2.240233000 | 2.311532000  |
| H | 1.249158000  | -1.443669000 | 3.580365000  |
| H | 1.574958000  | -1.237280000 | 0.431769000  |
| H | 1.659269000  | 0.523990000  | 0.307997000  |
| H | 3.367517000  | -1.210882000 | 2.214193000  |
| H | 3.292233000  | 0.539428000  | 2.292824000  |
| H | 5.511043000  | -1.698174000 | 1.345930000  |
| H | 5.829854000  | -1.250735000 | -0.324418000 |
| H | 4.960236000  | -3.580605000 | 0.077724000  |
| H | 3.388878000  | -2.923592000 | 0.564719000  |
| H | 2.933021000  | -3.771620000 | -3.075436000 |
| H | 3.744687000  | -4.802280000 | -1.870633000 |
| H | 1.905144000  | -4.396112000 | -0.218406000 |
| H | 1.365934000  | -5.129660000 | -1.741631000 |
| H | -0.515847000 | -2.939714000 | 0.083292000  |
| H | -0.615062000 | -4.462868000 | -0.830232000 |

|   |              |              |              |
|---|--------------|--------------|--------------|
| H | -1.534630000 | -3.336935000 | -2.806784000 |
| H | -2.534780000 | -3.078007000 | -1.358206000 |
| H | -2.654757000 | -1.577074000 | -3.828118000 |
| H | -2.115170000 | 0.065618000  | -3.485698000 |
| H | -4.279677000 | -1.466502000 | -1.908597000 |
| H | -4.601720000 | -0.386842000 | -3.252846000 |
| H | 3.462923000  | 2.029852000  | -1.122503000 |
| H | 4.975422000  | 2.632687000  | -1.404782000 |
| H | -1.534289000 | 1.850709000  | -0.461863000 |
| H | -1.193034000 | 2.707802000  | -1.858167000 |
| H | -3.401251000 | -0.143334000 | 1.176124000  |
| H | -4.594486000 | 0.682174000  | 1.986100000  |
| H | 0.749293000  | 0.669005000  | 2.538842000  |
| H | -0.240145000 | -0.009423000 | 1.323702000  |
| H | -1.481388000 | -0.791678000 | -1.164020000 |
| H | -0.569513000 | -1.197072000 | -2.498251000 |
| H | 3.275328000  | -1.866797000 | -1.659611000 |
| H | 4.684064000  | -2.614122000 | -2.085701000 |

[F<sub>2</sub>C<sub>6</sub>H<sub>2</sub>]<sup>5+</sup>

|   |              |              |              |
|---|--------------|--------------|--------------|
| F | 0.019559000  | -1.090946000 | -0.061694000 |
| N | -3.438559000 | 0.772098000  | -0.484079000 |
| N | 3.479792000  | -0.284886000 | 0.517942000  |
| N | -1.257996000 | 3.214886000  | -0.390920000 |
| N | 3.502017000  | 3.161808000  | -0.148199000 |
| N | -1.582530000 | -1.455822000 | -2.217269000 |
| N | 1.986190000  | -2.053000000 | -1.703562000 |
| N | -3.186589000 | -0.980160000 | 2.048824000  |
| N | 0.972491000  | -1.378330000 | 2.485615000  |
| C | -3.641608000 | 2.252525000  | -0.526785000 |
| C | -2.563022000 | 3.115384000  | -1.181181000 |
| C | -0.193371000 | 4.068660000  | -1.079694000 |
| C | 1.168381000  | 4.126055000  | -0.370201000 |
| C | 2.080271000  | 2.909114000  | -0.604918000 |
| C | 4.479304000  | 1.987094000  | -0.298620000 |
| C | 4.369479000  | 0.889592000  | 0.768162000  |
| C | -3.519442000 | 0.211877000  | -1.864674000 |
| C | -3.076231000 | -1.243254000 | -2.051325000 |
| C | -1.241774000 | -2.871828000 | -2.670456000 |
| C | 0.169156000  | -3.055235000 | -3.239867000 |
| C | 1.354205000  | -3.301000000 | -2.300487000 |
| C | 3.293163000  | -2.354865000 | -0.999140000 |
| C | 4.087223000  | -1.132062000 | -0.544660000 |
| C | -4.557472000 | 0.201761000  | 0.335667000  |
| C | -4.258382000 | 0.068535000  | 1.825638000  |
| C | -2.705402000 | -1.201031000 | 3.479618000  |
| C | -1.328913000 | -1.873620000 | 3.489823000  |
| C | -0.161306000 | -0.873730000 | 3.350677000  |

|   |              |              |              |
|---|--------------|--------------|--------------|
| C | 2.270846000  | -0.630656000 | 2.732198000  |
| C | 3.407357000  | -1.047227000 | 1.797300000  |
| H | -1.466685000 | 3.632992000  | 0.530330000  |
| H | -0.916961000 | 2.257721000  | -0.214207000 |
| H | 3.892501000  | 3.954413000  | -0.689203000 |
| H | 3.517211000  | 3.480475000  | 0.835689000  |
| H | -1.259253000 | -0.812466000 | -2.954208000 |
| H | -1.038562000 | -1.232924000 | -1.324242000 |
| H | 2.183262000  | -1.395583000 | -2.472189000 |
| H | 1.298740000  | -1.589001000 | -1.036551000 |
| H | -2.391750000 | -0.732046000 | 1.432360000  |
| H | -3.545932000 | -1.884397000 | 1.703750000  |
| H | 1.136975000  | -2.373803000 | 2.701719000  |
| H | 0.668762000  | -1.309936000 | 1.461709000  |
| H | -4.573963000 | 2.503035000  | -1.073574000 |
| H | -3.810684000 | 2.605725000  | 0.503402000  |
| H | -2.946038000 | 4.142034000  | -1.273860000 |
| H | -2.284114000 | 2.781822000  | -2.189269000 |
| H | -0.620514000 | 5.079556000  | -1.134949000 |
| H | -0.107122000 | 3.691753000  | -2.108553000 |
| H | 1.653862000  | 5.026985000  | -0.784043000 |
| H | 1.039096000  | 4.334874000  | 0.705471000  |
| H | 2.156212000  | 2.683443000  | -1.678775000 |
| H | 1.755816000  | 1.995875000  | -0.083647000 |
| H | 4.370679000  | 1.630899000  | -1.331111000 |
| H | 5.474982000  | 2.447427000  | -0.218849000 |
| H | 4.070657000  | 1.350856000  | 1.724471000  |
| H | 5.408429000  | 0.540785000  | 0.938818000  |
| H | -4.557062000 | 0.272786000  | -2.247180000 |
| H | -2.929878000 | 0.846639000  | -2.544320000 |
| H | -3.542437000 | -1.623563000 | -2.971617000 |
| H | -3.401779000 | -1.906734000 | -1.239096000 |
| H | -1.431346000 | -3.535715000 | -1.815778000 |
| H | -1.969353000 | -3.122323000 | -3.454709000 |
| H | 0.103545000  | -3.972852000 | -3.849553000 |
| H | 0.403460000  | -2.273486000 | -3.985478000 |
| H | 2.151059000  | -3.805304000 | -2.864390000 |
| H | 1.081968000  | -3.953088000 | -1.458894000 |
| H | 3.052734000  | -3.049168000 | -0.183207000 |
| H | 3.918855000  | -2.914332000 | -1.709920000 |
| H | 4.288709000  | -0.500455000 | -1.424158000 |
| H | 5.077883000  | -1.522847000 | -0.232444000 |
| H | -5.479763000 | 0.802688000  | 0.231404000  |
| H | -4.825625000 | -0.790113000 | -0.059871000 |
| H | -5.158727000 | -0.247163000 | 2.372004000  |
| H | -3.894997000 | 0.998913000  | 2.282790000  |
| H | -2.700903000 | -0.223484000 | 3.981256000  |
| H | -3.462196000 | -1.823649000 | 3.974980000  |
| H | -1.291802000 | -2.647796000 | 2.703660000  |
| H | -1.232855000 | -2.422349000 | 4.438425000  |
| H | 0.257009000  | -0.634254000 | 4.337858000  |
| H | -0.476364000 | 0.075568000  | 2.892369000  |

|   |             |              |             |
|---|-------------|--------------|-------------|
| H | 2.038166000 | 0.439354000  | 2.645236000 |
| H | 2.547279000 | -0.831098000 | 3.777026000 |
| H | 3.320281000 | -2.122420000 | 1.584746000 |
| H | 4.354010000 | -0.958442000 | 2.362710000 |

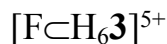

|   |              |              |              |
|---|--------------|--------------|--------------|
| N | -1.541483000 | -0.631290000 | 2.440832000  |
| N | 2.096990000  | 3.555066000  | -1.254181000 |
| N | 3.430410000  | -0.961437000 | 3.434245000  |
| C | -1.831304000 | -3.115466000 | -1.924385000 |
| H | -2.549413000 | -3.708896000 | -2.506487000 |
| H | -1.618042000 | -3.682181000 | -1.007143000 |
| N | 1.940227000  | -2.560075000 | -2.806630000 |
| C | -0.405019000 | 3.878192000  | -1.202055000 |
| H | -0.316603000 | 4.799269000  | -1.801767000 |
| H | -0.348201000 | 4.205363000  | -0.148862000 |
| N | -2.570941000 | -1.858829000 | -1.506207000 |
| C | 3.302346000  | -1.105541000 | -1.185817000 |
| C | 3.786218000  | -0.108977000 | 0.996699000  |
| C | 0.697289000  | -2.627429000 | -1.939799000 |
| H | 0.641404000  | -1.676423000 | -1.390525000 |
| H | 0.877021000  | -3.442314000 | -1.223537000 |
| C | 3.264893000  | -2.340057000 | -2.063428000 |
| H | 3.438532000  | -3.252325000 | -1.478262000 |
| H | 4.037503000  | -2.296885000 | -2.847344000 |
| N | -2.380777000 | 2.409179000  | -0.437488000 |
| N | -3.963235000 | -0.051235000 | 0.611571000  |
| C | 3.611619000  | -1.237925000 | 0.175444000  |
| H | 3.793111000  | -2.239989000 | 0.576590000  |
| C | 3.179825000  | 0.184179000  | -1.730343000 |
| H | 3.033297000  | 0.312914000  | -2.807518000 |
| C | 3.645444000  | 1.166593000  | 0.429671000  |
| H | 3.860908000  | 2.045613000  | 1.045141000  |
| C | 3.338941000  | 1.326667000  | -0.934227000 |
| C | -3.861894000 | 2.131669000  | -0.648403000 |
| H | -3.952727000 | 1.630250000  | -1.621687000 |
| H | -4.369183000 | 3.103652000  | -0.730348000 |
| C | -3.829800000 | -2.191063000 | -0.718857000 |
| H | -3.504764000 | -2.771166000 | 0.155873000  |
| H | -4.442154000 | -2.857625000 | -1.343109000 |
| C | 3.327793000  | 2.694325000  | -1.584924000 |
| H | 4.196088000  | 3.296152000  | -1.276523000 |
| H | 3.352038000  | 2.613958000  | -2.679515000 |
| C | 4.313958000  | -0.229679000 | 2.413859000  |
| H | 5.267524000  | -0.781878000 | 2.421586000  |
| H | 4.507223000  | 0.759286000  | 2.849456000  |
| C | -0.564089000 | -2.899965000 | -2.767692000 |
| H | -0.432660000 | -3.831108000 | -3.343713000 |

|   |              |              |              |
|---|--------------|--------------|--------------|
| H | -0.731092000 | -2.107420000 | -3.517082000 |
| C | -4.478105000 | 1.328475000  | 0.493573000  |
| H | -4.302705000 | 1.861765000  | 1.441791000  |
| H | -5.576465000 | 1.357522000  | 0.352944000  |
| C | -0.397320000 | -0.201790000 | 3.325756000  |
| H | -0.650555000 | -0.492432000 | 4.355912000  |
| H | -0.365230000 | 0.896218000  | 3.290825000  |
| C | 0.747612000  | 2.928947000  | -1.549346000 |
| H | 0.708132000  | 1.986911000  | -0.983836000 |
| H | 0.750961000  | 2.694191000  | -2.623561000 |
| C | 0.939535000  | -0.815977000 | 2.879824000  |
| H | 0.864984000  | -1.916849000 | 2.925532000  |
| H | 1.143867000  | -0.532702000 | 1.836215000  |
| C | -1.807152000 | 3.323902000  | -1.502486000 |
| H | -2.504778000 | 4.168086000  | -1.587756000 |
| H | -1.842728000 | 2.777254000  | -2.455063000 |
| C | -4.644073000 | -0.960884000 | -0.333643000 |
| H | -4.902857000 | -0.400032000 | -1.245687000 |
| H | -5.612929000 | -1.328798000 | 0.058367000  |
| C | -2.883846000 | -0.077394000 | 2.888401000  |
| H | -2.781985000 | 1.016741000  | 2.905132000  |
| H | -3.054149000 | -0.406620000 | 3.923555000  |
| C | -4.037184000 | -0.543954000 | 2.002316000  |
| H | -4.060636000 | -1.645429000 | 1.994711000  |
| H | -4.975267000 | -0.244732000 | 2.509812000  |
| C | 2.078548000  | -0.357534000 | 3.801316000  |
| H | 2.215456000  | 0.732532000  | 3.796347000  |
| H | 1.886569000  | -0.663095000 | 4.840318000  |
| F | -1.030450000 | -0.004929000 | -0.132356000 |
| H | 2.137885000  | 3.841626000  | -0.263206000 |
| H | 2.193400000  | 4.436576000  | -1.790478000 |
| H | -1.607924000 | -1.659322000 | 2.475387000  |
| H | -1.357792000 | -0.361896000 | 1.407828000  |
| H | -2.861924000 | -1.363377000 | -2.362572000 |
| H | 1.824480000  | -1.830241000 | -3.527558000 |
| H | 3.307302000  | -1.948261000 | 3.155893000  |
| H | 2.037754000  | -3.443742000 | -3.339109000 |
| H | 3.994322000  | -1.007464000 | 4.302422000  |
| H | -2.289798000 | 2.887373000  | 0.471256000  |
| H | -1.970250000 | -1.171792000 | -0.947478000 |
| H | -1.856638000 | 1.480573000  | -0.355688000 |

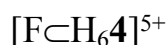

|   |              |             |              |
|---|--------------|-------------|--------------|
| C | -0.659928000 | 3.608626000 | -0.454118000 |
| C | 0.773402000  | 3.624801000 | 0.074173000  |
| C | -2.969734000 | 2.508642000 | -0.393947000 |
| N | 1.657782000  | 2.517742000 | -0.472918000 |
| N | -1.557585000 | 2.563932000 | 0.187562000  |



|   |              |              |              |
|---|--------------|--------------|--------------|
| C | 3.075365000  | 2.497773000  | 0.097833000  |
| C | 3.874347000  | 1.310600000  | -0.431282000 |
| C | -3.816379000 | 1.424711000  | 0.267107000  |
| C | -3.866289000 | -0.425595000 | -1.325042000 |
| C | 2.992463000  | -1.190975000 | -2.232202000 |
| N | -1.642283000 | -1.107363000 | -2.305802000 |
| N | -3.363057000 | 0.029159000  | 0.002800000  |
| N | 3.359437000  | -0.022608000 | -0.006393000 |
| C | 0.679463000  | -1.767630000 | -3.165855000 |
| C | -3.059868000 | -1.557421000 | -1.955903000 |
| C | 3.823660000  | -1.071904000 | -0.957959000 |
| N | 1.573358000  | -1.678067000 | -1.940813000 |
| C | -0.756091000 | -2.202251000 | -2.874697000 |
| C | 3.838882000  | -0.335841000 | 1.370166000  |
| C | -3.863421000 | -0.879536000 | 1.073918000  |
| C | -3.032025000 | -0.874030000 | 2.353325000  |
| N | 1.595181000  | -0.868687000 | 2.411215000  |
| N | -1.629208000 | -1.430730000 | 2.117653000  |
| C | 3.006217000  | -1.374632000 | 2.115924000  |
| C | -0.731063000 | -1.403630000 | 3.342699000  |
| C | 0.696424000  | -1.886718000 | 3.091972000  |
| H | -0.707191000 | 3.463947000  | -1.543482000 |
| H | -1.111137000 | 4.590966000  | -0.246745000 |
| H | 1.234795000  | 4.580255000  | -0.218786000 |
| H | 0.819449000  | 3.575144000  | 1.171918000  |
| H | -3.429590000 | 3.494796000  | -0.233164000 |
| H | -2.856640000 | 2.368652000  | -1.477822000 |
| H | 1.738552000  | 2.646569000  | -1.494148000 |
| H | 1.230705000  | 1.576085000  | -0.310022000 |
| H | -1.135591000 | 1.606243000  | 0.122331000  |
| H | -1.646716000 | 2.792258000  | 1.190471000  |
| H | 3.561229000  | 3.440968000  | -0.191700000 |
| H | 2.973210000  | 2.498814000  | 1.191754000  |
| H | 3.896593000  | 1.352485000  | -1.531981000 |
| H | 4.925215000  | 1.465434000  | -0.119644000 |
| H | -4.859877000 | 1.587931000  | -0.064734000 |
| H | -3.836837000 | 1.596474000  | 1.355116000  |
| H | -3.884045000 | 0.432875000  | -2.015506000 |
| H | -4.917339000 | -0.769211000 | -1.272851000 |
| H | 2.892420000  | -0.240977000 | -2.775067000 |
| H | 3.454829000  | -1.916938000 | -2.916990000 |
| H | -1.723339000 | -0.360684000 | -3.014275000 |
| H | -1.217667000 | -0.679264000 | -1.449483000 |
| H | 0.729281000  | -0.799454000 | -3.685517000 |
| H | 1.131288000  | -2.511255000 | -3.839913000 |
| H | -3.539523000 | -1.891756000 | -2.887448000 |
| H | -2.958390000 | -2.434447000 | -1.301820000 |
| H | 4.872051000  | -0.907663000 | -1.273369000 |
| H | 3.834153000  | -2.045471000 | -0.442518000 |
| H | 1.153928000  | -1.055121000 | -1.209077000 |
| H | 1.651117000  | -2.622842000 | -1.531818000 |
| H | -1.213387000 | -2.525814000 | -3.822203000 |

|   |              |              |              |
|---|--------------|--------------|--------------|
| H | -0.807233000 | -3.061389000 | -2.189976000 |
| H | 3.867657000  | 0.594338000  | 1.959750000  |
| H | 4.883083000  | -0.703757000 | 1.368740000  |
| H | -4.903885000 | -0.639108000 | 1.366181000  |
| H | -3.910976000 | -1.906931000 | 0.679056000  |
| H | -2.902893000 | 0.129563000  | 2.781412000  |
| H | -3.512036000 | -1.501525000 | 3.118497000  |
| H | 1.169961000  | -0.529134000 | 1.515152000  |
| H | 1.685753000  | -0.052802000 | 3.037361000  |
| H | -1.199693000 | -0.907193000 | 1.317625000  |
| H | -1.734554000 | -2.413742000 | 1.820170000  |
| H | 2.892269000  | -2.316836000 | 1.562358000  |
| H | 3.478009000  | -1.612733000 | 3.080515000  |
| H | -0.765972000 | -0.386104000 | 3.758968000  |
| H | -1.189420000 | -2.066895000 | 4.092011000  |
| H | 0.729749000  | -2.810879000 | 2.496421000  |
| H | 1.154451000  | -2.121250000 | 4.064928000  |
| F | 0.001806000  | -0.006244000 | 0.008837000  |

[F<sub>5</sub>C<sub>2</sub>H<sub>5</sub>]<sup>5+</sup>

|   |              |              |              |
|---|--------------|--------------|--------------|
| F | 0.000073000  | 0.001636000  | 0.001410000  |
| N | -2.618119000 | 0.002980000  | 0.004619000  |
| H | -1.537190000 | 0.001983000  | 0.003252000  |
| N | -1.116679000 | -2.129294000 | -2.026231000 |
| N | 1.106118000  | -2.129677000 | -2.030222000 |
| N | 2.618570000  | -0.000015000 | -0.003721000 |
| H | 1.537934000  | 0.000847000  | -0.000474000 |
| N | -1.110944000 | 2.822805000  | -0.828769000 |
| N | 1.111467000  | 2.821837000  | -0.831232000 |
| N | -1.106141000 | -0.693838000 | 2.858118000  |
| N | 1.116186000  | -0.695243000 | 2.855107000  |
| C | -3.117349000 | -0.790158000 | -1.202166000 |
| H | -3.002612000 | -0.146009000 | -2.083093000 |
| H | -4.197277000 | -0.943169000 | -1.055166000 |
| C | -2.470020000 | -2.161336000 | -1.471369000 |
| H | -2.466202000 | -2.806826000 | -0.581606000 |
| H | -3.123335000 | -2.670757000 | -2.197475000 |
| C | -0.004044000 | -2.248212000 | -1.325040000 |
| H | -0.002160000 | -2.449853000 | -0.257598000 |
| C | 0.769475000  | -1.977911000 | -3.475157000 |
| H | 1.187276000  | -2.823788000 | -4.039405000 |
| H | 1.196591000  | -1.050728000 | -3.881811000 |
| C | -0.785148000 | -1.975182000 | -3.472078000 |
| H | -1.210629000 | -1.045322000 | -3.874430000 |
| H | -1.208119000 | -2.817991000 | -4.036998000 |
| C | 2.461508000  | -2.162795000 | -1.480493000 |
| H | 3.111423000  | -2.672972000 | -2.209075000 |
| H | 2.460326000  | -2.808058000 | -0.590554000 |
| C | 3.111521000  | -0.792433000 | -1.213457000 |

|   |              |              |              |
|---|--------------|--------------|--------------|
| H | 4.191987000  | -0.946404000 | -1.071671000 |
| H | 2.992918000  | -0.147354000 | -2.093216000 |
| C | -3.113519000 | 1.445837000  | -0.077432000 |
| H | -2.994837000 | 1.886477000  | 0.920569000  |
| H | -4.194061000 | 1.398245000  | -0.280669000 |
| C | -2.465893000 | 2.362470000  | -1.131727000 |
| H | -2.465001000 | 1.914225000  | -2.135389000 |
| H | -3.116764000 | 3.247874000  | -1.209019000 |
| C | -0.000503000 | 2.274758000  | -1.286876000 |
| H | -0.001570000 | 1.454988000  | -1.999637000 |
| C | 0.778961000  | 3.993220000  | 0.029613000  |
| H | 1.198875000  | 4.906284000  | -0.415807000 |
| H | 1.206961000  | 3.874852000  | 1.034774000  |
| C | -0.775507000 | 3.993869000  | 0.031333000  |
| H | -1.201390000 | 3.875567000  | 1.037364000  |
| H | -1.195828000 | 4.907294000  | -0.413070000 |
| C | 2.465231000  | 2.360506000  | -1.138497000 |
| H | 3.116670000  | 3.245394000  | -1.216881000 |
| H | 2.460795000  | 1.913222000  | -2.142552000 |
| C | 3.115691000  | 1.442369000  | -0.087167000 |
| H | 3.001902000  | 1.882676000  | 0.911626000  |
| H | 4.195266000  | 1.393232000  | -0.295018000 |
| C | -3.113778000 | -0.646096000 | 1.296003000  |
| H | -3.001116000 | -1.731081000 | 1.176639000  |
| H | -4.193189000 | -0.440796000 | 1.359383000  |
| C | -2.460107000 | -0.195964000 | 2.615505000  |
| H | -2.454490000 | 0.897187000  | 2.730865000  |
| H | -3.109813000 | -0.570100000 | 3.422664000  |
| C | 0.005119000  | -0.025516000 | 2.610140000  |
| H | 0.005452000  | 1.001470000  | 2.256114000  |
| C | 0.782245000  | -2.025698000 | 3.440331000  |
| H | 1.205187000  | -2.097490000 | 4.452399000  |
| H | 1.206024000  | -2.838266000 | 2.833926000  |
| C | -0.772391000 | -2.023537000 | 3.445166000  |
| H | -1.202313000 | -2.836803000 | 2.844124000  |
| H | -1.189262000 | -2.090702000 | 4.460156000  |
| C | 2.470130000  | -0.199692000 | 2.607308000  |
| H | 3.122243000  | -0.574554000 | 3.412164000  |
| H | 2.466590000  | 0.893546000  | 2.722224000  |
| C | 3.118088000  | -0.650879000 | 1.285280000  |
| H | 3.002517000  | -1.735693000 | 1.166189000  |
| H | 4.198103000  | -0.447967000 | 1.344483000  |

Cartesian coordinate representation of the optimized molecular structures of  $H_61^{6+}$ ,  $H_62^{6+}$ ,  $H_63^{6+}$ ,  $H_64^{6+}$ ,  $H_25^{5+}$ ,  $H_6222^{6+}$ ,  $[F\text{C}H_61]^{5+}$ ,  $[F\text{C}H_62]^{5+}$ ,  $[F\text{C}H_63]^{5+}$ ,  $[F\text{C}H_64]^{5+}$  and  $[F\text{C}H_25]^{4+}$  at B3P86/TZVP level of theory:

| $H_61^{6+}$ |              |              |              |
|-------------|--------------|--------------|--------------|
| N           | -3.142773000 | 1.683522000  | 0.362087000  |
| C           | -3.224386000 | 1.537849000  | 1.828628000  |
| C           | -3.080636000 | 0.077238000  | 2.275975000  |
| N           | -2.755803000 | -0.044017000 | 3.737543000  |
| C           | -2.614503000 | -1.454221000 | 4.290872000  |
| C           | -1.610337000 | -2.322118000 | 3.555244000  |
| O           | -0.293902000 | -1.780661000 | 3.535883000  |
| C           | 4.157158000  | -0.446425000 | -0.585742000 |
| C           | 3.562601000  | 0.913093000  | -0.974608000 |
| N           | 4.612758000  | 1.962284000  | -1.212990000 |
| C           | 4.108960000  | 3.304746000  | -1.732585000 |
| C           | 3.436912000  | 4.194586000  | -0.713684000 |
| O           | 2.105593000  | 3.765655000  | -0.414662000 |
| C           | 1.489055000  | 4.514255000  | 0.627745000  |
| C           | 0.338529000  | 5.398024000  | 0.188345000  |
| N           | -0.877603000 | 4.666430000  | -0.371222000 |
| C           | -1.396920000 | 3.506443000  | 0.433013000  |
| C           | -2.795663000 | 3.068173000  | -0.019416000 |
| N           | 3.113110000  | -1.482775000 | -0.432891000 |
| C           | 3.564762000  | -2.603722000 | 0.424519000  |
| C           | 3.830646000  | -2.312271000 | 1.893725000  |
| N           | 2.626433000  | -1.918498000 | 2.731020000  |
| C           | 1.807890000  | -3.032188000 | 3.342453000  |
| C           | 0.714930000  | -2.496265000 | 4.253134000  |
| C           | -4.432719000 | 1.321101000  | -0.273603000 |
| C           | -4.369306000 | 0.967434000  | -1.758050000 |
| N           | -3.966304000 | -0.459350000 | -2.035626000 |
| C           | -3.670528000 | -0.776394000 | -3.483953000 |
| C           | -3.109454000 | -2.171432000 | -3.634282000 |
| O           | -1.888984000 | -2.259345000 | -2.886190000 |
| C           | -1.409001000 | -3.583332000 | -2.665960000 |
| C           | -0.177330000 | -3.937622000 | -3.474085000 |
| N           | 1.010661000  | -3.015525000 | -3.242255000 |
| C           | 1.473533000  | -2.831197000 | -1.823198000 |
| C           | 2.762835000  | -2.002578000 | -1.771788000 |
| H           | -2.839903000 | 3.120571000  | -1.110200000 |
| H           | -3.541539000 | 3.784505000  | 0.355380000  |
| H           | -0.679467000 | 2.695279000  | 0.313672000  |
| H           | -1.389239000 | 3.839125000  | 1.470658000  |

|   |              |              |              |
|---|--------------|--------------|--------------|
| H | -0.657657000 | 4.356695000  | -1.320523000 |
| H | -1.613567000 | 5.374462000  | -0.477450000 |
| H | 0.634028000  | 6.108128000  | -0.585466000 |
| H | -0.015468000 | 5.968846000  | 1.049128000  |
| H | 2.203183000  | 5.189971000  | 1.108890000  |
| H | 1.163799000  | 3.813542000  | 1.401822000  |
| H | 4.033406000  | 4.252460000  | 0.205707000  |
| H | 3.430467000  | 5.199160000  | -1.150775000 |
| H | 4.996058000  | 3.823825000  | -2.101553000 |
| H | 3.464983000  | 3.090818000  | -2.585268000 |
| H | 5.292156000  | 1.615499000  | -1.899750000 |
| H | 5.159799000  | 2.126444000  | -0.361456000 |
| H | 2.900401000  | 1.300441000  | -0.202942000 |
| H | 2.996889000  | 0.856836000  | -1.904060000 |
| H | 4.916023000  | -0.755396000 | -1.319805000 |
| H | 4.683744000  | -0.338183000 | 0.363221000  |
| H | 2.819034000  | -3.397249000 | 0.352898000  |
| H | 4.501440000  | -3.041904000 | 0.049503000  |
| H | 4.565066000  | -1.519819000 | 2.033542000  |
| H | 4.253798000  | -3.207518000 | 2.351814000  |
| H | 2.971054000  | -1.344183000 | 3.505378000  |
| H | 2.010361000  | -1.320385000 | 2.176330000  |
| H | 1.406232000  | -3.634161000 | 2.528607000  |
| H | 2.496230000  | -3.646485000 | 3.926318000  |
| H | 1.138692000  | -1.833313000 | 5.014667000  |
| H | 0.293793000  | -3.353086000 | 4.785649000  |
| H | -1.927137000 | -2.493383000 | 2.522850000  |
| H | -1.637103000 | -3.295874000 | 4.053011000  |
| H | -2.350035000 | -1.329131000 | 5.342129000  |
| H | -3.601679000 | -1.917797000 | 4.244273000  |
| H | -3.479950000 | 0.422307000  | 4.296327000  |
| H | -1.885763000 | 0.454391000  | 3.939942000  |
| H | -3.990980000 | -0.501758000 | 2.119332000  |
| H | -2.262452000 | -0.392340000 | 1.732758000  |
| H | -4.148963000 | 1.974005000  | 2.232430000  |
| H | -2.398904000 | 2.103311000  | 2.267245000  |
| H | -5.159129000 | 2.139227000  | -0.177001000 |
| H | -4.875113000 | 0.486341000  | 0.275396000  |
| H | -3.672730000 | 1.596599000  | -2.310339000 |
| H | -5.354013000 | 1.101683000  | -2.207836000 |
| H | -4.714100000 | -1.081966000 | -1.715066000 |
| H | -3.128347000 | -0.700431000 | -1.500884000 |
| H | -4.597622000 | -0.676478000 | -4.050153000 |
| H | -2.965932000 | -0.022028000 | -3.832973000 |
| H | -3.822894000 | -2.924027000 | -3.279717000 |
| H | -2.945106000 | -2.350771000 | -4.701144000 |
| H | -1.214526000 | -3.692745000 | -1.596029000 |
| H | -2.164728000 | -4.332039000 | -2.922109000 |
| H | 0.146361000  | -4.949450000 | -3.222853000 |
| H | -0.365173000 | -3.902925000 | -4.548507000 |
| H | 0.776806000  | -2.105885000 | -3.647312000 |
| H | 1.781495000  | -3.384693000 | -3.810859000 |

|   |             |              |              |
|---|-------------|--------------|--------------|
| H | 0.669685000 | -2.328000000 | -1.288102000 |
| H | 1.601047000 | -3.833512000 | -1.414829000 |
| H | 3.592659000 | -2.594007000 | -2.187242000 |
| H | 2.633323000 | -1.142302000 | -2.432773000 |

H<sub>6</sub>2<sup>6+</sup>

|   |              |              |              |
|---|--------------|--------------|--------------|
| N | -2.834010000 | -0.591046000 | 0.665389000  |
| C | -3.387347000 | -1.965967000 | 0.600314000  |
| C | -2.449439000 | -3.056569000 | 0.073150000  |
| N | -2.437780000 | -3.227161000 | -1.436037000 |
| C | -1.185471000 | -3.828344000 | -2.047850000 |
| C | 0.010261000  | -2.880856000 | -1.928768000 |
| C | 1.214319000  | -3.341813000 | -2.752886000 |
| N | 2.458183000  | -2.536445000 | -2.424433000 |
| C | 2.463107000  | -1.078414000 | -2.848953000 |
| C | 3.391493000  | -0.165237000 | -2.042052000 |
| C | -1.710438000 | -0.434650000 | 1.599078000  |
| C | -1.886687000 | -0.894157000 | 3.067762000  |
| N | -0.787593000 | -0.362680000 | 3.975501000  |
| C | 0.644804000  | -0.781761000 | 3.669166000  |
| C | 1.643920000  | 0.321277000  | 4.026448000  |
| C | 3.123284000  | 0.000208000  | 3.812360000  |
| N | 3.618002000  | -0.096874000 | 2.368974000  |
| C | 3.574382000  | 1.165058000  | 1.539182000  |
| C | 3.907065000  | 0.973069000  | 0.057020000  |
| C | -3.913931000 | 0.404801000  | 0.864186000  |
| C | -3.584880000 | 1.852722000  | 0.490097000  |
| N | -3.625433000 | 2.153089000  | -0.990055000 |
| C | -3.133038000 | 3.530286000  | -1.435281000 |
| C | -1.654005000 | 3.850732000  | -1.218290000 |
| C | -0.654071000 | 3.107221000  | -2.107081000 |
| N | 0.777075000  | 3.554397000  | -1.838207000 |
| C | 1.879452000  | 2.516799000  | -1.987467000 |
| C | 1.706117000  | 1.330275000  | -1.006396000 |
| N | 2.832228000  | 0.410450000  | -0.794943000 |
| H | -4.290692000 | -1.936100000 | -0.014071000 |
| H | -3.740539000 | -2.311608000 | 1.579892000  |
| H | -2.757900000 | -4.021921000 | 0.475529000  |
| H | -1.418610000 | -2.892660000 | 0.378027000  |
| H | -2.632634000 | -2.333908000 | -1.892381000 |
| H | -3.223168000 | -3.837734000 | -1.695588000 |
| H | -1.432608000 | -4.039120000 | -3.090362000 |
| H | -1.013317000 | -4.783042000 | -1.548755000 |
| H | 0.311896000  | -2.804851000 | -0.879430000 |
| H | -0.297889000 | -1.883935000 | -2.259217000 |
| H | 1.047122000  | -3.246398000 | -3.826712000 |
| H | 1.469477000  | -4.383656000 | -2.548178000 |
| H | 3.250402000  | -3.005625000 | -2.881830000 |
| H | 2.645749000  | -2.611325000 | -1.422661000 |

|   |              |              |              |
|---|--------------|--------------|--------------|
| H | 1.429930000  | -0.740639000 | -2.819696000 |
| H | 2.776386000  | -1.077471000 | -3.893398000 |
| H | 3.733587000  | 0.613883000  | -2.734618000 |
| H | 4.302316000  | -0.710906000 | -1.783225000 |
| H | -1.441959000 | 0.625770000  | 1.604435000  |
| H | -0.851288000 | -0.956098000 | 1.170427000  |
| H | -1.869417000 | -1.978465000 | 3.176624000  |
| H | -2.820415000 | -0.535328000 | 3.503807000  |
| H | -1.014125000 | -0.660300000 | 4.933792000  |
| H | -0.845976000 | 0.659615000  | 4.009792000  |
| H | 0.668829000  | -1.029037000 | 2.609094000  |
| H | 0.830424000  | -1.695344000 | 4.235593000  |
| H | 1.575599000  | 0.536272000  | 5.098656000  |
| H | 1.378896000  | 1.257270000  | 3.524552000  |
| H | 3.403738000  | -0.943835000 | 4.283871000  |
| H | 3.726005000  | 0.781532000  | 4.277711000  |
| H | 3.134828000  | -0.847866000 | 1.874894000  |
| H | 4.597252000  | -0.401079000 | 2.434831000  |
| H | 4.308478000  | 1.841937000  | 1.979672000  |
| H | 2.592828000  | 1.609098000  | 1.694842000  |
| H | 4.782633000  | 0.325535000  | -0.033275000 |
| H | 4.254796000  | 1.950424000  | -0.300825000 |
| H | -4.265400000 | 0.437409000  | 1.903115000  |
| H | -4.786507000 | 0.075431000  | 0.294849000  |
| H | -2.604812000 | 2.164391000  | 0.846581000  |
| H | -4.321816000 | 2.511841000  | 0.952232000  |
| H | -4.603743000 | 2.098138000  | -1.299416000 |
| H | -3.138552000 | 1.416828000  | -1.502129000 |
| H | -3.735993000 | 4.251061000  | -0.881026000 |
| H | -3.414878000 | 3.618188000  | -2.486506000 |
| H | -1.388408000 | 3.736618000  | -0.162490000 |
| H | -1.587247000 | 4.925506000  | -1.420677000 |
| H | -0.842292000 | 3.285668000  | -3.166658000 |
| H | -0.673719000 | 2.032157000  | -1.935172000 |
| H | 0.835925000  | 3.973719000  | -0.905241000 |
| H | 0.999672000  | 4.329480000  | -2.476932000 |
| H | 2.811638000  | 3.058775000  | -1.819794000 |
| H | 1.863239000  | 2.207338000  | -3.032353000 |
| H | 0.849106000  | 0.733880000  | -1.328408000 |
| H | 1.435071000  | 1.736298000  | -0.027532000 |

### H<sub>6</sub>3<sup>6+</sup>

|   |              |              |              |
|---|--------------|--------------|--------------|
| N | -2.325663000 | 3.687133000  | -0.575176000 |
| H | -2.738682000 | 4.628770000  | -0.614632000 |
| H | -2.045621000 | 3.483254000  | -1.537028000 |
| N | -1.981486000 | -2.001419000 | 3.446956000  |
| H | -1.928532000 | -2.896139000 | 2.951642000  |
| H | -2.242443000 | -2.255031000 | 4.409926000  |
| N | -2.475834000 | -2.118502000 | -3.154725000 |
| H | -2.441919000 | -1.274026000 | -3.732725000 |

|   |              |              |              |
|---|--------------|--------------|--------------|
| H | -2.830756000 | -2.849105000 | -3.787256000 |
| N | 2.272031000  | 3.757531000  | -0.468114000 |
| H | 3.079145000  | 4.081323000  | -1.015805000 |
| H | 2.476726000  | 4.059227000  | 0.491217000  |
| N | 2.526106000  | -1.619083000 | 2.539427000  |
| H | 1.828919000  | -1.504837000 | 1.803538000  |
| H | 2.908095000  | -2.564767000 | 2.435050000  |
| N | 2.045605000  | -1.520332000 | -2.875748000 |
| H | 1.399331000  | -0.965755000 | -2.314504000 |
| H | 2.245820000  | -0.972386000 | -3.718841000 |
| N | 3.320621000  | 0.059708000  | -0.182566000 |
| C | -3.158374000 | 1.273798000  | -0.020071000 |
| C | -3.257562000 | 0.401834000  | -1.108266000 |
| H | -3.489307000 | 0.805805000  | -2.090372000 |
| C | -3.202424000 | -0.986420000 | -0.932689000 |
| C | -3.083210000 | -1.494063000 | 0.364262000  |
| H | -3.165630000 | -2.567546000 | 0.509315000  |
| C | -2.998224000 | -0.650087000 | 1.475250000  |
| C | -3.023766000 | 0.728730000  | 1.261521000  |
| H | -3.046258000 | 1.392392000  | 2.120280000  |
| C | -3.468557000 | 2.751458000  | -0.163307000 |
| H | -4.246349000 | 2.911377000  | -0.912663000 |
| H | -3.843102000 | 3.154703000  | 0.777927000  |
| C | -3.137542000 | -1.170603000 | 2.892854000  |
| H | -3.269355000 | -0.346680000 | 3.593534000  |
| H | -4.018369000 | -1.811696000 | 2.980769000  |
| C | -3.530104000 | -1.949076000 | -2.057657000 |
| H | -3.707499000 | -2.950212000 | -1.666097000 |
| H | -4.438901000 | -1.642927000 | -2.581442000 |
| C | -1.135079000 | 3.715609000  | 0.349757000  |
| H | -0.751497000 | 2.696011000  | 0.373419000  |
| H | -1.549775000 | 3.937896000  | 1.333637000  |
| C | -0.070336000 | 4.775437000  | 0.029425000  |
| H | -0.567233000 | 5.694889000  | -0.300775000 |
| H | 0.369895000  | 5.076887000  | 0.985898000  |
| C | 1.052134000  | 4.530460000  | -0.983011000 |
| H | 0.741348000  | 4.026103000  | -1.898673000 |
| H | 1.448412000  | 5.503933000  | -1.277413000 |
| C | -0.640990000 | -1.323434000 | 3.453016000  |
| H | -0.751394000 | -0.437389000 | 4.080404000  |
| H | -0.482565000 | -0.992915000 | 2.423738000  |
| C | 0.494288000  | -2.210110000 | 3.972184000  |
| H | 0.324061000  | -2.446064000 | 5.027029000  |
| H | 0.522582000  | -3.177582000 | 3.458613000  |
| C | 1.865940000  | -1.532126000 | 3.909398000  |
| H | 1.814121000  | -0.474862000 | 4.171299000  |
| H | 2.553990000  | -2.007220000 | 4.609224000  |
| C | -1.096975000 | -2.485417000 | -2.684654000 |
| H | -1.194204000 | -3.441803000 | -2.168230000 |
| H | -0.838672000 | -1.725617000 | -1.943191000 |
| C | -0.067117000 | -2.587683000 | -3.814431000 |
| H | -0.105566000 | -1.716965000 | -4.478972000 |



|   |              |              |              |
|---|--------------|--------------|--------------|
| H | -0.301860000 | -3.446606000 | -4.450083000 |
| C | 1.364886000  | -2.808259000 | -3.315829000 |
| H | 1.409830000  | -3.499013000 | -2.473121000 |
| H | 1.982117000  | -3.223801000 | -4.113093000 |
| C | 2.193303000  | 2.255517000  | -0.555598000 |
| H | 2.028277000  | 2.038209000  | -1.611596000 |
| H | 1.311974000  | 1.947196000  | 0.005157000  |
| C | 3.434825000  | 1.530577000  | -0.023035000 |
| H | 4.343004000  | 1.911767000  | -0.509750000 |
| H | 3.545407000  | 1.760821000  | 1.038130000  |
| C | 3.638158000  | -0.621529000 | 2.284030000  |
| H | 3.258219000  | 0.348687000  | 2.602758000  |
| H | 4.455278000  | -0.886374000 | 2.957529000  |
| C | 4.153859000  | -0.622801000 | 0.848451000  |
| H | 4.318306000  | -1.655061000 | 0.528072000  |
| H | 5.157296000  | -0.177579000 | 0.887213000  |
| C | 3.338075000  | -1.663727000 | -2.092859000 |
| H | 4.072640000  | -2.074935000 | -2.787011000 |
| H | 3.157478000  | -2.413223000 | -1.323076000 |
| C | 3.838676000  | -0.333428000 | -1.524488000 |
| H | 4.934500000  | -0.389341000 | -1.506694000 |
| H | 3.615753000  | 0.465019000  | -2.238161000 |

#### H<sub>6</sub>4<sup>6+</sup>

|   |              |              |              |
|---|--------------|--------------|--------------|
| C | 3.973039000  | -0.550518000 | -0.236158000 |
| C | 3.333624000  | -0.508825000 | -1.621829000 |
| C | 3.446062000  | -1.354628000 | 2.164748000  |
| N | 3.311009000  | -1.584725000 | 0.671462000  |
| C | 2.523830000  | -2.201052000 | 3.041269000  |
| N | 2.014297000  | 0.177196000  | -1.685515000 |
| C | 2.178287000  | 1.651062000  | -1.782588000 |
| C | 1.168903000  | -0.348581000 | -2.783326000 |
| N | 1.182544000  | -1.566987000 | 3.406270000  |
| C | 0.260151000  | -1.489158000 | -2.292042000 |
| C | 1.069568000  | 2.350059000  | -0.981467000 |
| N | 1.049841000  | 3.859289000  | -1.029828000 |
| N | -0.796875000 | -1.907895000 | -3.288664000 |
| C | 0.221916000  | -1.302986000 | 2.270994000  |
| C | -1.858342000 | -2.913210000 | -2.815999000 |
| C | 0.211239000  | 4.577577000  | 0.031403000  |
| C | -2.414965000 | -2.780987000 | -1.400688000 |
| C | -1.032064000 | -0.513488000 | 2.683024000  |
| N | -1.949503000 | -0.266595000 | 1.541444000  |
| C | -1.317117000 | 4.442109000  | -0.044721000 |
| C | -1.672003000 | 2.070734000  | 0.897513000  |
| N | -3.388213000 | -1.660380000 | -1.135403000 |
| C | -2.922207000 | -1.388181000 | 1.460847000  |
| N | -2.004132000 | 3.539047000  | 0.982759000  |
| C | -2.570365000 | 1.077161000  | 1.653874000  |

|   |              |              |              |
|---|--------------|--------------|--------------|
| C | -3.910567000 | -1.499107000 | 0.303000000  |
| H | 5.028150000  | -0.819287000 | -0.313437000 |
| H | 3.912941000  | 0.406957000  | 0.280687000  |
| H | 4.063740000  | -0.039179000 | -2.292206000 |
| H | 3.221732000  | -1.528224000 | -2.002739000 |
| H | 4.479175000  | -1.599722000 | 2.422986000  |
| H | 3.327693000  | -0.284900000 | 2.344269000  |
| H | 3.709674000  | -2.504521000 | 0.447616000  |
| H | 2.325754000  | -1.620361000 | 0.408297000  |
| H | 3.028007000  | -2.370789000 | 3.996947000  |
| H | 2.311731000  | -3.188244000 | 2.624715000  |
| H | 3.149774000  | 1.924631000  | -1.365853000 |
| H | 2.192405000  | 1.984866000  | -2.826995000 |
| H | 1.774377000  | -0.671843000 | -3.638417000 |
| H | 0.538907000  | 0.465391000  | -3.153022000 |
| H | 1.361674000  | -0.707482000 | 3.939177000  |
| H | 0.742022000  | -2.199770000 | 4.089661000  |
| H | 0.824583000  | -2.393941000 | -2.060697000 |
| H | -0.260584000 | -1.158381000 | -1.392671000 |
| H | 1.173514000  | 2.086850000  | 0.069742000  |
| H | 0.091030000  | 2.025051000  | -1.330277000 |
| H | 2.005528000  | 4.224183000  | -0.912823000 |
| H | 0.772047000  | 4.190550000  | -1.962882000 |
| H | -0.344880000 | -2.350038000 | -4.102532000 |
| H | -1.254465000 | -1.082634000 | -3.688500000 |
| H | 0.766169000  | -0.729395000 | 1.518585000  |
| H | -0.031223000 | -2.283195000 | 1.864489000  |
| H | -1.384551000 | -3.896565000 | -2.865449000 |
| H | -2.638198000 | -2.909316000 | -3.582587000 |
| H | 0.624068000  | 4.294020000  | 1.001237000  |
| H | 0.451119000  | 5.635245000  | -0.106441000 |
| H | -1.630034000 | -2.708825000 | -0.652095000 |
| H | -2.957554000 | -3.711275000 | -1.209098000 |
| H | -0.714721000 | 0.449752000  | 3.089350000  |
| H | -1.553357000 | -1.027616000 | 3.501138000  |
| H | -1.675202000 | 4.128144000  | -1.026825000 |
| H | -1.743401000 | 5.432662000  | 0.134994000  |
| H | -0.646704000 | 1.979018000  | 1.251392000  |
| H | -1.695262000 | 1.827165000  | -0.163064000 |
| H | -3.005801000 | -0.763965000 | -1.433934000 |
| H | -4.227933000 | -1.806515000 | -1.713027000 |
| H | -2.349831000 | -2.315679000 | 1.529983000  |
| H | -3.583880000 | -1.397859000 | 2.340241000  |
| H | -1.822194000 | 3.900978000  | 1.927895000  |
| H | -3.014206000 | 3.687187000  | 0.850073000  |
| H | -2.722199000 | 1.376039000  | 2.697662000  |
| H | -3.562152000 | 1.060261000  | 1.199667000  |
| H | -4.522869000 | -2.383620000 | 0.495586000  |
| H | -4.601343000 | -0.656344000 | 0.244388000  |

$\text{H}_2\mathbf{5}^{5+}$

|   |              |              |              |
|---|--------------|--------------|--------------|
| N | -2.800607000 | 0.000332000  | 0.000259000  |
| N | -1.110153000 | -1.896938000 | -2.007789000 |
| N | 1.108515000  | -1.896887000 | -2.008031000 |
| N | 2.800652000  | -0.000692000 | -0.000588000 |
| N | -1.109083000 | -0.791413000 | 2.646046000  |
| N | 1.109719000  | -0.791731000 | 2.645820000  |
| N | -1.108734000 | 2.688834000  | -0.638892000 |
| N | 1.109686000  | 2.688477000  | -0.639205000 |
| C | -3.256368000 | -0.816349000 | -1.206267000 |
| H | -3.237962000 | -0.153825000 | -2.070805000 |
| H | -4.300586000 | -1.078997000 | -1.023627000 |
| C | -2.463940000 | -2.093424000 | -1.483825000 |
| H | -2.409786000 | -2.748714000 | -0.612510000 |
| H | -3.035658000 | -2.653235000 | -2.230163000 |
| C | -0.000762000 | -2.047056000 | -1.323085000 |
| H | -0.000635000 | -2.304016000 | -0.269739000 |
| C | 0.772329000  | -1.775464000 | -3.457088000 |
| H | 1.189995000  | -2.630662000 | -3.991499000 |
| H | 1.199948000  | -0.867900000 | -3.882264000 |
| C | -0.774320000 | -1.775930000 | -3.456957000 |
| H | -1.202555000 | -0.868848000 | -3.882516000 |
| H | -1.191598000 | -2.631678000 | -3.990803000 |
| C | 2.462357000  | -2.094229000 | -1.484492000 |
| H | 3.033473000  | -2.654543000 | -2.230913000 |
| H | 2.408006000  | -2.749334000 | -0.613056000 |
| C | 3.255611000  | -0.817605000 | -1.207275000 |
| H | 4.299763000  | -1.080761000 | -1.024989000 |
| H | 3.237237000  | -0.155079000 | -2.071814000 |
| C | -3.256730000 | -0.635507000 | 1.311131000  |
| H | -3.240286000 | -1.715379000 | 1.169580000  |
| H | -4.300334000 | -0.344023000 | 1.448074000  |
| C | -2.462703000 | -0.238499000 | 2.555344000  |
| H | -2.407906000 | 0.843651000  | 2.686999000  |
| H | -3.033876000 | -0.604727000 | 3.413828000  |
| C | 0.000401000  | -0.123418000 | 2.433692000  |
| H | 0.000525000  | 0.917204000  | 2.129041000  |
| C | 0.773450000  | -2.107096000 | 3.265643000  |
| H | 1.191325000  | -2.141749000 | 4.273400000  |
| H | 1.201033000  | -2.929166000 | 2.692531000  |
| C | -0.773054000 | -2.106864000 | 3.265841000  |
| H | -1.201040000 | -2.928824000 | 2.692875000  |
| H | -1.190674000 | -2.141339000 | 4.273709000  |
| C | 2.463505000  | -0.239320000 | 2.554615000  |
| H | 3.034827000  | -0.605688000 | 3.412939000  |
| H | 2.409135000  | 0.842864000  | 2.686193000  |
| C | 3.256962000  | -0.636688000 | 1.310150000  |
| H | 4.300721000  | -0.345601000 | 1.446755000  |
| H | 3.240099000  | -1.716559000 | 1.168638000  |
| C | -3.255102000 | 1.454243000  | -0.103303000 |

|   |              |              |              |
|---|--------------|--------------|--------------|
| H | -3.236524000 | 1.870988000  | 0.903004000  |
| H | -4.299474000 | 1.428214000  | -0.421917000 |
| C | -2.462777000 | 2.333472000  | -1.070425000 |
| H | -2.408977000 | 1.906530000  | -2.073483000 |
| H | -3.034397000 | 3.259846000  | -1.181586000 |
| C | 0.000326000  | 2.170486000  | -1.111576000 |
| H | 0.000092000  | 1.385882000  | -1.859934000 |
| C | 0.774036000  | 3.881764000  | 0.191989000  |
| H | 1.191733000  | 4.772852000  | -0.280196000 |
| H | 1.201740000  | 3.794748000  | 1.190393000  |
| C | -0.772469000 | 3.882019000  | 0.192200000  |
| H | -1.199926000 | 3.795173000  | 1.190724000  |
| H | -1.190002000 | 4.773231000  | -0.279898000 |
| C | 2.463496000  | 2.332671000  | -1.071091000 |
| H | 3.035456000  | 3.258849000  | -1.182152000 |
| H | 2.409370000  | 1.905952000  | -2.074226000 |
| C | 3.255747000  | 1.453008000  | -0.104299000 |
| H | 4.299977000  | 1.426559000  | -0.423355000 |
| H | 3.237770000  | 1.869748000  | 0.902021000  |
| H | -1.778888000 | -0.001106000 | 0.001190000  |
| H | 1.778927000  | -0.001694000 | 0.000677000  |



|   |              |              |              |
|---|--------------|--------------|--------------|
| N | 4.141933000  | -0.202320000 | 0.504530000  |
| C | 3.145198000  | -0.308758000 | 1.589878000  |
| C | 1.735897000  | -0.319409000 | 1.004976000  |
| N | 0.607643000  | -0.197129000 | 1.978295000  |
| C | 0.388374000  | -1.343844000 | 2.917720000  |
| C | -0.846404000 | -1.147174000 | 3.764800000  |
| O | -1.976387000 | -1.122738000 | 2.915735000  |
| C | -3.212925000 | -1.065101000 | 3.615602000  |
| C | -4.316675000 | -1.278098000 | 2.612947000  |
| N | -4.283176000 | -0.232424000 | 1.529995000  |
| C | -5.251665000 | -0.484919000 | 0.411528000  |
| C | -5.161487000 | 0.554771000  | -0.688530000 |
| C | 5.077788000  | 0.924484000  | 0.717919000  |
| C | 4.493895000  | 2.323176000  | 0.614557000  |
| N | 4.088285000  | 2.695260000  | -0.782115000 |
| C | 3.530874000  | 4.086932000  | -0.991650000 |
| C | 2.332277000  | 4.398678000  | -0.133324000 |
| O | 1.315102000  | 3.414106000  | -0.328526000 |
| C | 0.200824000  | 3.583107000  | 0.539898000  |
| C | -1.107045000 | 3.892074000  | -0.158108000 |
| N | -1.682349000 | 2.745462000  | -0.941224000 |
| C | -3.137911000 | 2.955491000  | -1.258835000 |
| C | -3.734136000 | 1.859178000  | -2.119503000 |
| C | 4.953523000  | -1.431308000 | 0.372834000  |
| C | 4.219415000  | -2.687676000 | -0.061862000 |
| N | 3.791771000  | -2.658001000 | -1.501822000 |

|   |              |              |              |
|---|--------------|--------------|--------------|
| C | 3.053388000  | -3.874291000 | -2.019435000 |
| C | 1.749318000  | -4.156391000 | -1.320560000 |
| O | 0.845939000  | -3.061804000 | -1.476748000 |
| C | -0.436331000 | -3.322739000 | -0.911756000 |
| C | -1.545983000 | -2.811647000 | -1.802703000 |
| N | -1.467072000 | -1.337864000 | -2.050019000 |
| C | -2.505359000 | -0.819935000 | -3.014331000 |
| C | -3.863893000 | -0.544182000 | -2.400755000 |
| N | -3.893804000 | 0.564529000  | -1.438233000 |
| F | -1.136405000 | 0.297292000  | 0.128598000  |
| H | -4.692770000 | 2.235110000  | -2.501519000 |
| H | -3.112307000 | 1.732583000  | -3.008193000 |
| H | -3.222981000 | 3.913230000  | -1.774483000 |
| H | -3.650462000 | 3.055464000  | -0.302059000 |
| H | -1.842122000 | 4.155010000  | 0.604133000  |
| H | -1.015870000 | 4.742590000  | -0.834492000 |
| H | 0.379229000  | 4.402733000  | 1.241431000  |
| H | 0.084500000  | 2.669320000  | 1.132000000  |
| H | 1.986056000  | 5.394696000  | -0.428832000 |
| H | 2.604822000  | 4.453201000  | 0.925814000  |
| H | 4.329792000  | 4.797486000  | -0.774433000 |
| H | 3.293499000  | 4.155094000  | -2.053812000 |
| H | 3.617803000  | 2.460324000  | 1.245693000  |
| H | 5.248382000  | 3.044320000  | 0.932277000  |
| H | 5.893262000  | 0.825777000  | -0.002996000 |
| H | 5.552600000  | 0.864145000  | 1.706863000  |
| H | -5.317947000 | 1.544588000  | -0.251720000 |
| H | -6.022451000 | 0.393905000  | -1.352459000 |
| H | -6.253914000 | -0.476625000 | 0.841776000  |
| H | -5.061208000 | -1.497682000 | 0.058071000  |
| H | -5.293783000 | -1.232153000 | 3.094509000  |
| H | -4.215296000 | -2.245431000 | 2.122319000  |
| H | -3.317520000 | -0.106633000 | 4.139804000  |
| H | -3.283055000 | -1.859323000 | 4.366293000  |
| H | -0.901856000 | -1.981039000 | 4.473693000  |
| H | -0.779004000 | -0.224461000 | 4.357656000  |
| H | 0.292090000  | -2.243754000 | 2.310020000  |
| H | 1.260294000  | -1.444502000 | 3.563900000  |
| H | 1.545499000  | -1.229044000 | 0.432447000  |
| H | 1.618428000  | 0.520626000  | 0.319205000  |
| H | 3.331112000  | -1.200476000 | 2.195902000  |
| H | 3.250274000  | 0.535193000  | 2.278617000  |
| H | 5.448193000  | -1.681880000 | 1.321567000  |
| H | 5.762351000  | -1.229851000 | -0.334209000 |
| H | 4.885520000  | -3.544097000 | 0.052045000  |
| H | 3.329822000  | -2.881986000 | 0.534575000  |
| H | 2.900274000  | -3.702826000 | -3.085617000 |
| H | 3.720480000  | -4.730029000 | -1.904383000 |
| H | 1.896795000  | -4.381671000 | -0.258508000 |
| H | 1.342803000  | -5.061155000 | -1.785278000 |
| H | -0.501312000 | -2.871607000 | 0.085492000  |
| H | -0.597884000 | -4.398080000 | -0.794139000 |

|   |              |              |              |
|---|--------------|--------------|--------------|
| H | -1.511746000 | -3.300407000 | -2.777004000 |
| H | -2.509064000 | -3.034918000 | -1.345065000 |
| H | -2.610078000 | -1.560539000 | -3.807895000 |
| H | -2.081598000 | 0.072687000  | -3.472774000 |
| H | -4.232164000 | -1.447264000 | -1.910381000 |
| H | -4.551190000 | -0.372769000 | -3.242235000 |
| H | 3.398204000  | 2.017822000  | -1.110204000 |
| H | 4.901681000  | 2.602795000  | -1.397632000 |
| H | -1.540351000 | 1.820664000  | -0.450132000 |
| H | -1.168072000 | 2.675718000  | -1.820207000 |
| H | -3.327746000 | -0.164197000 | 1.151686000  |
| H | -4.497584000 | 0.674476000  | 1.951673000  |
| H | 0.731808000  | 0.647508000  | 2.539288000  |
| H | -0.251795000 | -0.034063000 | 1.351690000  |
| H | -1.471846000 | -0.772060000 | -1.158777000 |
| H | -0.551419000 | -1.173142000 | -2.469486000 |
| H | 3.217186000  | -1.828254000 | -1.660168000 |
| H | 4.625700000  | -2.544384000 | -2.086130000 |

[F<sub>6</sub>H<sub>2</sub>]<sup>5+</sup>

|   |              |              |              |
|---|--------------|--------------|--------------|
| F | 0.015146000  | -1.106329000 | -0.059297000 |
| N | -3.409411000 | 0.769592000  | -0.476405000 |
| N | 3.447435000  | -0.282776000 | 0.504980000  |
| N | -1.257795000 | 3.199753000  | -0.359360000 |
| N | 3.462778000  | 3.151189000  | -0.127103000 |
| N | -1.567130000 | -1.427553000 | -2.205285000 |
| N | 1.972859000  | -2.019049000 | -1.703391000 |
| N | -3.142238000 | -0.995792000 | 2.019884000  |
| N | 0.972818000  | -1.396887000 | 2.455585000  |
| C | -3.617375000 | 2.236309000  | -0.502291000 |
| C | -2.548095000 | 3.103208000  | -1.146674000 |
| C | -0.207221000 | 4.054336000  | -1.037590000 |
| C | 1.146916000  | 4.109474000  | -0.332594000 |
| C | 2.052508000  | 2.900604000  | -0.573781000 |
| C | 4.425311000  | 1.984894000  | -0.287039000 |
| C | 4.312061000  | 0.889886000  | 0.771101000  |
| C | -3.487299000 | 0.227216000  | -1.849884000 |
| C | -3.048206000 | -1.218601000 | -2.045424000 |
| C | -1.231729000 | -2.829964000 | -2.658835000 |
| C | 0.169416000  | -3.009746000 | -3.230367000 |
| C | 1.348119000  | -3.255895000 | -2.297267000 |
| C | 3.277496000  | -2.319429000 | -1.023134000 |
| C | 4.057666000  | -1.101939000 | -0.559470000 |
| C | -4.511443000 | 0.189104000  | 0.334415000  |
| C | -4.206377000 | 0.044615000  | 1.812830000  |
| C | -2.676407000 | -1.231503000 | 3.438848000  |
| C | -1.308464000 | -1.900458000 | 3.447248000  |
| C | -0.150914000 | -0.902456000 | 3.315771000  |

|   |              |              |              |
|---|--------------|--------------|--------------|
| C | 2.256515000  | -0.652626000 | 2.703086000  |
| C | 3.381381000  | -1.055887000 | 1.762972000  |
| H | -1.467405000 | 3.607982000  | 0.556100000  |
| H | -0.916041000 | 2.251802000  | -0.189412000 |
| H | 3.847818000  | 3.937861000  | -0.663587000 |
| H | 3.484096000  | 3.465203000  | 0.848659000  |
| H | -1.242739000 | -0.786124000 | -2.930535000 |
| H | -1.032218000 | -1.214408000 | -1.318634000 |
| H | 2.155378000  | -1.358930000 | -2.460948000 |
| H | 1.297400000  | -1.571334000 | -1.032293000 |
| H | -2.350354000 | -0.742812000 | 1.417827000  |
| H | -3.495276000 | -1.888073000 | 1.664218000  |
| H | 1.138201000  | -2.384810000 | 2.662838000  |
| H | 0.671050000  | -1.323843000 | 1.443384000  |
| H | -4.544756000 | 2.484110000  | -1.039938000 |
| H | -3.782723000 | 2.577570000  | 0.523502000  |
| H | -2.932451000 | 4.120807000  | -1.232975000 |
| H | -2.270922000 | 2.779069000  | -2.148960000 |
| H | -0.632550000 | 5.057178000  | -1.085493000 |
| H | -0.119605000 | 3.689200000  | -2.061521000 |
| H | 1.630089000  | 5.004966000  | -0.737477000 |
| H | 1.018719000  | 4.308236000  | 0.736342000  |
| H | 2.120770000  | 2.679253000  | -1.640332000 |
| H | 1.730927000  | 1.993608000  | -0.057889000 |
| H | 4.309576000  | 1.633273000  | -1.311186000 |
| H | 5.417159000  | 2.433252000  | -0.212372000 |
| H | 3.994996000  | 1.342816000  | 1.715708000  |
| H | 5.342148000  | 0.551818000  | 0.955841000  |
| H | -4.516352000 | 0.292308000  | -2.229074000 |
| H | -2.899851000 | 0.860289000  | -2.518960000 |
| H | -3.507948000 | -1.587677000 | -2.963317000 |
| H | -3.376694000 | -1.882098000 | -1.246103000 |
| H | -1.416580000 | -3.492528000 | -1.813093000 |
| H | -1.954868000 | -3.077482000 | -3.436163000 |
| H | 0.104526000  | -3.916389000 | -3.840234000 |
| H | 0.400310000  | -2.226897000 | -3.963063000 |
| H | 2.137980000  | -3.754223000 | -2.859745000 |
| H | 1.078870000  | -3.906619000 | -1.464833000 |
| H | 3.055066000  | -3.023206000 | -0.221930000 |
| H | 3.897070000  | -2.856775000 | -1.743070000 |
| H | 4.248713000  | -0.464962000 | -1.426615000 |
| H | 5.044364000  | -1.482426000 | -0.254409000 |
| H | -5.429411000 | 0.781662000  | 0.238868000  |
| H | -4.773993000 | -0.793512000 | -0.064291000 |
| H | -5.096718000 | -0.273661000 | 2.357150000  |
| H | -3.845871000 | 0.965698000  | 2.270795000  |
| H | -2.673332000 | -0.268246000 | 3.949679000  |
| H | -3.429943000 | -1.855117000 | 3.919045000  |
| H | -1.269898000 | -2.660297000 | 2.659097000  |
| H | -1.211620000 | -2.451926000 | 4.384115000  |
| H | 0.261821000  | -0.668917000 | 4.297362000  |
| H | -0.466828000 | 0.041285000  | 2.866975000  |

|   |             |              |             |
|---|-------------|--------------|-------------|
| H | 2.023577000 | 0.409434000  | 2.627699000 |
| H | 2.537217000 | -0.859396000 | 3.736535000 |
| H | 3.289597000 | -2.119444000 | 1.538938000 |
| H | 4.324831000 | -0.975781000 | 2.317592000 |



|   |              |              |              |
|---|--------------|--------------|--------------|
| N | -1.535773000 | -0.377132000 | 2.479686000  |
| N | 2.083848000  | 3.368974000  | -1.609827000 |
| N | 3.400730000  | -0.569241000 | 3.494847000  |
| C | -1.823988000 | -3.267998000 | -1.596655000 |
| H | -2.539245000 | -3.901030000 | -2.121861000 |
| H | -1.619676000 | -3.748695000 | -0.639169000 |
| N | 1.927372000  | -2.823611000 | -2.498224000 |
| C | -0.397499000 | 3.699241000  | -1.591610000 |
| H | -0.308238000 | 4.543756000  | -2.281233000 |
| H | -0.339144000 | 4.132362000  | -0.586895000 |
| N | -2.543974000 | -1.982062000 | -1.300851000 |
| C | 3.271351000  | -1.223828000 | -1.043394000 |
| C | 3.753922000  | -0.000747000 | 0.998941000  |
| C | 0.692848000  | -2.809202000 | -1.640105000 |
| H | 0.641087000  | -1.822489000 | -1.176931000 |
| H | 0.861107000  | -3.556016000 | -0.862554000 |
| C | 3.233660000  | -2.540248000 | -1.777543000 |
| H | 3.393911000  | -3.376717000 | -1.098685000 |
| H | 4.011235000  | -2.585925000 | -2.544114000 |
| N | -2.353454000 | 2.328419000  | -0.678422000 |
| N | -3.928505000 | 0.015404000  | 0.614858000  |
| C | 3.580409000  | -1.205261000 | 0.313034000  |
| H | 3.760136000  | -2.149122000 | 0.819336000  |
| C | 3.147516000  | -0.011503000 | -1.722877000 |
| H | 2.998374000  | -0.003539000 | -2.798617000 |
| C | 3.613814000  | 1.194859000  | 0.299434000  |
| H | 3.826980000  | 2.130307000  | 0.808523000  |
| C | 3.307913000  | 1.202160000  | -1.063430000 |
| C | -3.821965000 | 2.036001000  | -0.855091000 |
| H | -3.916772000 | 1.434452000  | -1.759241000 |
| H | -4.323667000 | 2.986606000  | -1.041622000 |
| C | -3.791358000 | -2.227799000 | -0.490805000 |
| H | -3.471984000 | -2.713947000 | 0.431503000  |
| H | -4.400125000 | -2.947389000 | -1.040308000 |
| C | 3.296966000  | 2.484212000  | -1.855874000 |
| H | 4.166139000  | 3.103329000  | -1.624476000 |
| H | 3.312267000  | 2.285095000  | -2.926746000 |
| C | 4.280078000  | 0.035025000  | 2.413086000  |
| H | 5.225539000  | -0.509724000 | 2.478288000  |
| H | 4.475356000  | 1.058569000  | 2.730679000  |
| C | -0.559193000 | -3.139056000 | -2.444599000 |
| H | -0.432475000 | -4.108855000 | -2.934930000 |



|   |              |              |              |
|---|--------------|--------------|--------------|
| H | -0.712651000 | -2.415888000 | -3.252318000 |
| C | -4.432569000 | 1.367780000  | 0.361548000  |
| H | -4.245877000 | 1.992054000  | 1.239943000  |
| H | -5.522976000 | 1.387078000  | 0.228771000  |
| C | -0.400320000 | 0.153840000  | 3.296035000  |
| H | -0.646269000 | -0.013308000 | 4.346187000  |
| H | -0.372184000 | 1.231946000  | 3.134441000  |
| C | 0.746076000  | 2.721997000  | -1.835288000 |
| H | 0.702547000  | 1.851185000  | -1.179211000 |
| H | 0.746773000  | 2.377819000  | -2.870703000 |
| C | 0.929721000  | -0.498917000 | 2.924084000  |
| H | 0.862323000  | -1.578356000 | 3.100012000  |
| H | 1.128581000  | -0.342989000 | 1.861497000  |
| C | -1.790311000 | 3.117586000  | -1.827273000 |
| H | -2.484211000 | 3.940025000  | -2.000686000 |
| H | -1.825047000 | 2.477569000  | -2.709361000 |
| C | -4.600358000 | -0.971514000 | -0.235087000 |
| H | -4.848838000 | -0.507003000 | -1.193089000 |
| H | -5.565011000 | -1.292054000 | 0.182356000  |
| C | -2.865505000 | 0.215460000  | 2.865571000  |
| H | -2.767257000 | 1.297051000  | 2.769267000  |
| H | -3.034411000 | -0.003295000 | 3.920987000  |
| C | -4.009265000 | -0.336968000 | 2.034664000  |
| H | -4.029132000 | -1.425517000 | 2.134925000  |
| H | -4.943329000 | 0.007193000  | 2.499064000  |
| C | 2.060191000  | 0.070729000  | 3.776332000  |
| H | 2.193855000  | 1.143026000  | 3.631983000  |
| H | 1.864385000  | -0.096596000 | 4.836754000  |
| F | -1.029640000 | -0.022897000 | -0.127953000 |
| H | 2.128725000  | 3.749121000  | -0.660787000 |
| H | 2.177673000  | 4.185690000  | -2.226038000 |
| H | -1.596899000 | -1.385687000 | 2.631550000  |
| H | -1.359887000 | -0.230314000 | 1.435430000  |
| H | -2.830305000 | -1.571297000 | -2.191754000 |
| H | 1.816462000  | -2.168661000 | -3.276534000 |
| H | 3.280267000  | -1.573001000 | 3.334435000  |
| H | 2.023949000  | -3.744542000 | -2.943195000 |
| H | 3.954141000  | -0.515109000 | 4.358699000  |
| H | -2.259532000 | 2.893973000  | 0.167327000  |
| H | -1.939284000 | -1.258274000 | -0.819347000 |
| H | -1.835126000 | 1.422850000  | -0.503025000 |

[F<sub>4</sub>C<sub>6</sub>H<sub>4</sub>]<sup>5+</sup>

|   |              |             |              |
|---|--------------|-------------|--------------|
| C | -0.657341000 | 3.533672000 | -0.694789000 |
| C | 0.767771000  | 3.588164000 | -0.171110000 |
| C | -2.944570000 | 2.457791000 | -0.549905000 |
| N | 1.641507000  | 2.453686000 | -0.634421000 |
| N | -1.542676000 | 2.544888000 | 0.015956000  |

|   |              |              |              |
|---|--------------|--------------|--------------|
| C | 3.045093000  | 2.478002000  | -0.066099000 |
| C | 3.843853000  | 1.268629000  | -0.513554000 |
| C | -3.783625000 | 1.424874000  | 0.178675000  |
| C | -3.831946000 | -0.499632000 | -1.288017000 |
| C | 2.964755000  | -1.325435000 | -2.130051000 |
| N | -1.624659000 | -1.246864000 | -2.204890000 |
| N | -3.334038000 | 0.028537000  | -0.000484000 |
| N | 3.334511000  | -0.022284000 | -0.005093000 |
| C | 0.676640000  | -1.963630000 | -3.009032000 |
| C | -3.032922000 | -1.665846000 | -1.839113000 |
| C | 3.795080000  | -1.123327000 | -0.876318000 |
| N | 1.559900000  | -1.787392000 | -1.802914000 |
| C | -0.750908000 | -2.373394000 | -2.687748000 |
| C | 3.807436000  | -0.240360000 | 1.378185000  |
| C | -3.830063000 | -0.807856000 | 1.112602000  |
| C | -3.007357000 | -0.716401000 | 2.383866000  |
| N | 1.579335000  | -0.695324000 | 2.438514000  |
| N | -1.613541000 | -1.272738000 | 2.186635000  |
| C | 2.975490000  | -1.221869000 | 2.182105000  |
| C | -0.728426000 | -1.154514000 | 3.398467000  |
| C | 0.691283000  | -1.652776000 | 3.187077000  |
| H | -0.701042000 | 3.311343000  | -1.762439000 |
| H | -1.106607000 | 4.520134000  | -0.561849000 |
| H | 1.226239000  | 4.513100000  | -0.527404000 |
| H | 0.810372000  | 3.616566000  | 0.919020000  |
| H | -3.398667000 | 3.445203000  | -0.450240000 |
| H | -2.840534000 | 2.250980000  | -1.615176000 |
| H | 1.723775000  | 2.510183000  | -1.653070000 |
| H | 1.217788000  | 1.534464000  | -0.410600000 |
| H | -1.125164000 | 1.594239000  | 0.015184000  |
| H | -1.625620000 | 2.838634000  | 0.992845000  |
| H | 3.524034000  | 3.395285000  | -0.412600000 |
| H | 2.944620000  | 2.548485000  | 1.017070000  |
| H | 3.864995000  | 1.239992000  | -1.606229000 |
| H | 4.886081000  | 1.441050000  | -0.214671000 |
| H | -4.821350000 | 1.562932000  | -0.152505000 |
| H | -3.795390000 | 1.664160000  | 1.245284000  |
| H | -3.840490000 | 0.306649000  | -2.026470000 |
| H | -4.877061000 | -0.828478000 | -1.216924000 |
| H | 2.866244000  | -0.420665000 | -2.730206000 |
| H | 3.421232000  | -2.089504000 | -2.761636000 |
| H | -1.697859000 | -0.556186000 | -2.956680000 |
| H | -1.205286000 | -0.767335000 | -1.386606000 |
| H | 0.723108000  | -1.042433000 | -3.592658000 |
| H | 1.125375000  | -2.746895000 | -3.623556000 |
| H | -3.505831000 | -2.053009000 | -2.743233000 |
| H | -2.942217000 | -2.494079000 | -1.135997000 |
| H | 4.834604000  | -0.979055000 | -1.198802000 |
| H | 3.805988000  | -2.054026000 | -0.302963000 |
| H | 1.143065000  | -1.123147000 | -1.122328000 |
| H | 1.639727000  | -2.692798000 | -1.332446000 |
| H | -1.206169000 | -2.764434000 | -3.600141000 |

|   |              |              |              |
|---|--------------|--------------|--------------|
| H | -0.798476000 | -3.172598000 | -1.946135000 |
| H | 3.832323000  | 0.718529000  | 1.902650000  |
| H | 4.843687000  | -0.602742000 | 1.401204000  |
| H | -4.865286000 | -0.557640000 | 1.379918000  |
| H | -3.867423000 | -1.850834000 | 0.786992000  |
| H | -2.889388000 | 0.305194000  | 2.745529000  |
| H | -3.481611000 | -1.293266000 | 3.179651000  |
| H | 1.157167000  | -0.421337000 | 1.530566000  |
| H | 1.673048000  | 0.155847000  | 2.999083000  |
| H | -1.188841000 | -0.808913000 | 1.361059000  |
| H | -1.710981000 | -2.266000000 | 1.959926000  |
| H | 2.861863000  | -2.188890000 | 1.691783000  |
| H | 3.441304000  | -1.399787000 | 3.152899000  |
| H | -0.760242000 | -0.116331000 | 3.733900000  |
| H | -1.185299000 | -1.753263000 | 4.189236000  |
| H | 0.722004000  | -2.611461000 | 2.666224000  |
| H | 1.145722000  | -1.813449000 | 4.166945000  |
| F | -0.000153000 | -0.006503000 | 0.009113000  |

[F<sub>5</sub>C<sub>2</sub>H<sub>2</sub>]<sup>5+</sup>

|   |              |              |              |
|---|--------------|--------------|--------------|
| F | 0.003221000  | 0.001379000  | -0.002165000 |
| N | 2.609658000  | 0.033772000  | -0.025519000 |
| H | 1.542710000  | 0.018031000  | -0.014212000 |
| N | 1.140380000  | -0.604949000 | 2.821724000  |
| N | -1.062703000 | -0.630714000 | 2.845370000  |
| N | -2.603820000 | -0.033553000 | 0.024255000  |
| H | -1.538063000 | -0.017776000 | 0.011646000  |
| N | 1.045758000  | 2.767125000  | -0.892830000 |
| N | -1.157022000 | 2.761307000  | -0.870165000 |
| N | 1.113040000  | -2.131266000 | -1.961902000 |
| N | -1.089563000 | -2.164394000 | -1.938175000 |
| C | 3.119274000  | 0.051530000  | 1.399218000  |
| H | 3.005992000  | 1.067786000  | 1.773474000  |
| H | 4.190981000  | -0.152872000 | 1.352301000  |
| C | 2.485058000  | -0.935696000 | 2.380039000  |
| H | 2.480990000  | -1.956685000 | 1.996564000  |
| H | 3.134409000  | -0.957728000 | 3.258599000  |
| C | 0.039019000  | -1.104487000 | 2.322181000  |
| H | 0.039751000  | -1.858825000 | 1.551603000  |
| C | -0.732363000 | 0.292836000  | 3.954908000  |
| H | -1.129324000 | -0.103696000 | 4.890025000  |
| H | -1.171946000 | 1.276321000  | 3.788648000  |
| C | 0.812912000  | 0.316068000  | 3.933834000  |
| H | 1.218146000  | 1.310888000  | 3.748208000  |
| H | 1.246965000  | -0.060925000 | 4.860466000  |
| C | -2.408992000 | -0.989955000 | 2.430315000  |
| H | -3.040959000 | -1.020038000 | 3.321221000  |
| H | -2.393867000 | -2.012456000 | 2.051373000  |
| C | -3.079659000 | -0.016676000 | 1.460011000  |

|   |              |              |              |
|---|--------------|--------------|--------------|
| H | -4.149557000 | -0.234508000 | 1.439359000  |
| H | -2.970115000 | 1.002056000  | 1.828636000  |
| C | 3.074705000  | 1.275501000  | -0.755349000 |
| H | 2.960745000  | 1.089026000  | -1.822047000 |
| H | 4.144905000  | 1.372023000  | -0.560762000 |
| C | 2.397765000  | 2.596598000  | -0.387054000 |
| H | 2.391502000  | 2.774133000  | 0.689090000  |
| H | 3.019516000  | 3.390119000  | -0.808745000 |
| C | -0.048354000 | 2.559451000  | -0.205198000 |
| H | -0.037784000 | 2.265283000  | 0.832327000  |
| C | -0.841347000 | 3.211103000  | -2.244367000 |
| H | -1.328241000 | 4.165177000  | -2.446278000 |
| H | -1.197750000 | 2.484752000  | -2.976331000 |
| C | 0.698220000  | 3.327039000  | -2.219832000 |
| H | 1.177042000  | 2.769892000  | -3.024011000 |
| H | 1.037948000  | 4.362608000  | -2.271636000 |
| C | -2.496817000 | 2.535467000  | -0.353551000 |
| H | -3.153781000 | 3.300072000  | -0.774991000 |
| H | -2.486919000 | 2.722043000  | 0.720858000  |
| C | -3.125157000 | 1.185413000  | -0.705763000 |
| H | -3.017699000 | 0.996357000  | -1.772756000 |
| H | -4.195935000 | 1.241622000  | -0.499083000 |
| C | 3.115312000  | -1.202293000 | -0.737856000 |
| H | 3.032364000  | -2.036889000 | -0.043314000 |
| H | 4.180295000  | -1.045143000 | -0.921399000 |
| C | 2.448763000  | -1.567302000 | -2.065011000 |
| H | 2.416809000  | -0.726709000 | -2.759233000 |
| H | 3.094317000  | -2.310950000 | -2.538621000 |
| C | -0.000266000 | -1.461654000 | -2.114888000 |
| H | -0.018404000 | -0.417744000 | -2.384587000 |
| C | -0.737260000 | -3.582465000 | -1.698241000 |
| H | -1.154245000 | -4.202130000 | -2.492789000 |
| H | -1.143041000 | -3.929398000 | -0.747871000 |
| C | 0.807872000  | -3.559596000 | -1.716952000 |
| H | 1.245900000  | -3.896758000 | -0.777490000 |
| H | 1.223548000  | -4.165278000 | -2.522899000 |
| C | -2.443268000 | -1.640389000 | -2.009115000 |
| H | -3.078394000 | -2.403635000 | -2.465251000 |
| H | -2.452561000 | -0.801252000 | -2.705725000 |
| C | -3.086810000 | -1.290761000 | -0.666327000 |
| H | -2.955753000 | -2.116868000 | 0.030838000  |
| H | -4.161238000 | -1.172015000 | -0.821047000 |
